# Supplementary material for: Syntheses of optically active monapterin, 7,8-dihydromonapterin, and 5,6,7,8-tetrahydromonapterin from l-xylose
Source: Royal Society of Chemistry journal article supplement (doi:10.1039/d4ra07179d), 2024-01-01
Supplement: d4ra07179d1.pdf [file d4ra07179d1.pdf]

Supplementary Material (ESI) for Organic and Biomolecular Chemistry

**Syntheses of Optically Active Monapterin, 7,8-Dihydromonapterin, and  
5,6,7,8-Tetrahydromonapterin from L-Xylose**

Arun K. Ghosh\*, Ashish Sharma, Satish Nagam, and Clay Fuqua

**Table of Contents**

|                                                                                   |           |
|-----------------------------------------------------------------------------------|-----------|
| General Methods.....                                                              | S1        |
| Copies of <sup>1</sup> H- and <sup>13</sup> C-NMR Spectra of final compounds..... | S2 – S15  |
| HRMS Spectra.....                                                                 | S16 – S21 |
| HPLC Purity data,.....                                                            | S22– S27  |

**General Methods.**

All chemicals and reagents were purchased from commercial suppliers and used without further purification unless otherwise noted. The following reaction solvents were distilled prior to use: dichloromethane from calcium hydride, diethyl ether and tetrahydrofuran from Na and benzophenone, methanol and ethanol from activated magnesium under argon. All reactions were carried out under an argon atmosphere in either flame or oven-dried (120 °C) glassware. TLC analysis was conducted using glass-backed Thin-Layer Silica Gel Chromatography Plates (60 Å, 250 µm thickness, F-254 indicator). Column chromatography was performed using 230-400 mesh, 60 Å pore diameter silica gel. <sup>1</sup>H and <sup>13</sup>C NMR spectra were recorded at room temperature on a Bruker AV800, DRX-500 and ARX-400. Chemical shifts ( $\delta$  values) are reported in parts per million, and are referenced to the deuterated residual solvent peak. NMR data is reported as:  $\delta$  value (chemical shift, *J*-value (Hz), integration, where s = singlet, d = doublet, t = triplet, q = quartet, brs = broad singlet). Optical rotations were recorded on a Perkin Elmer 341 polarimeter. HRMS and LRMS spectra were recorded at the Purdue University Department of Chemistry Mass Spectrometry Center. A Thermo Finnigan LCQ Classic mass was used for MS analyses. HPLC analysis and purification was done on an Agilent 1200 series instruments. The solid compound purified by reverse phase HPLC column purification using ZORBAX-NH<sub>2</sub>, 5 µm, 4.6×250 mm column for purification. The purity of test compounds was determined by HRMS and HPLC analysis

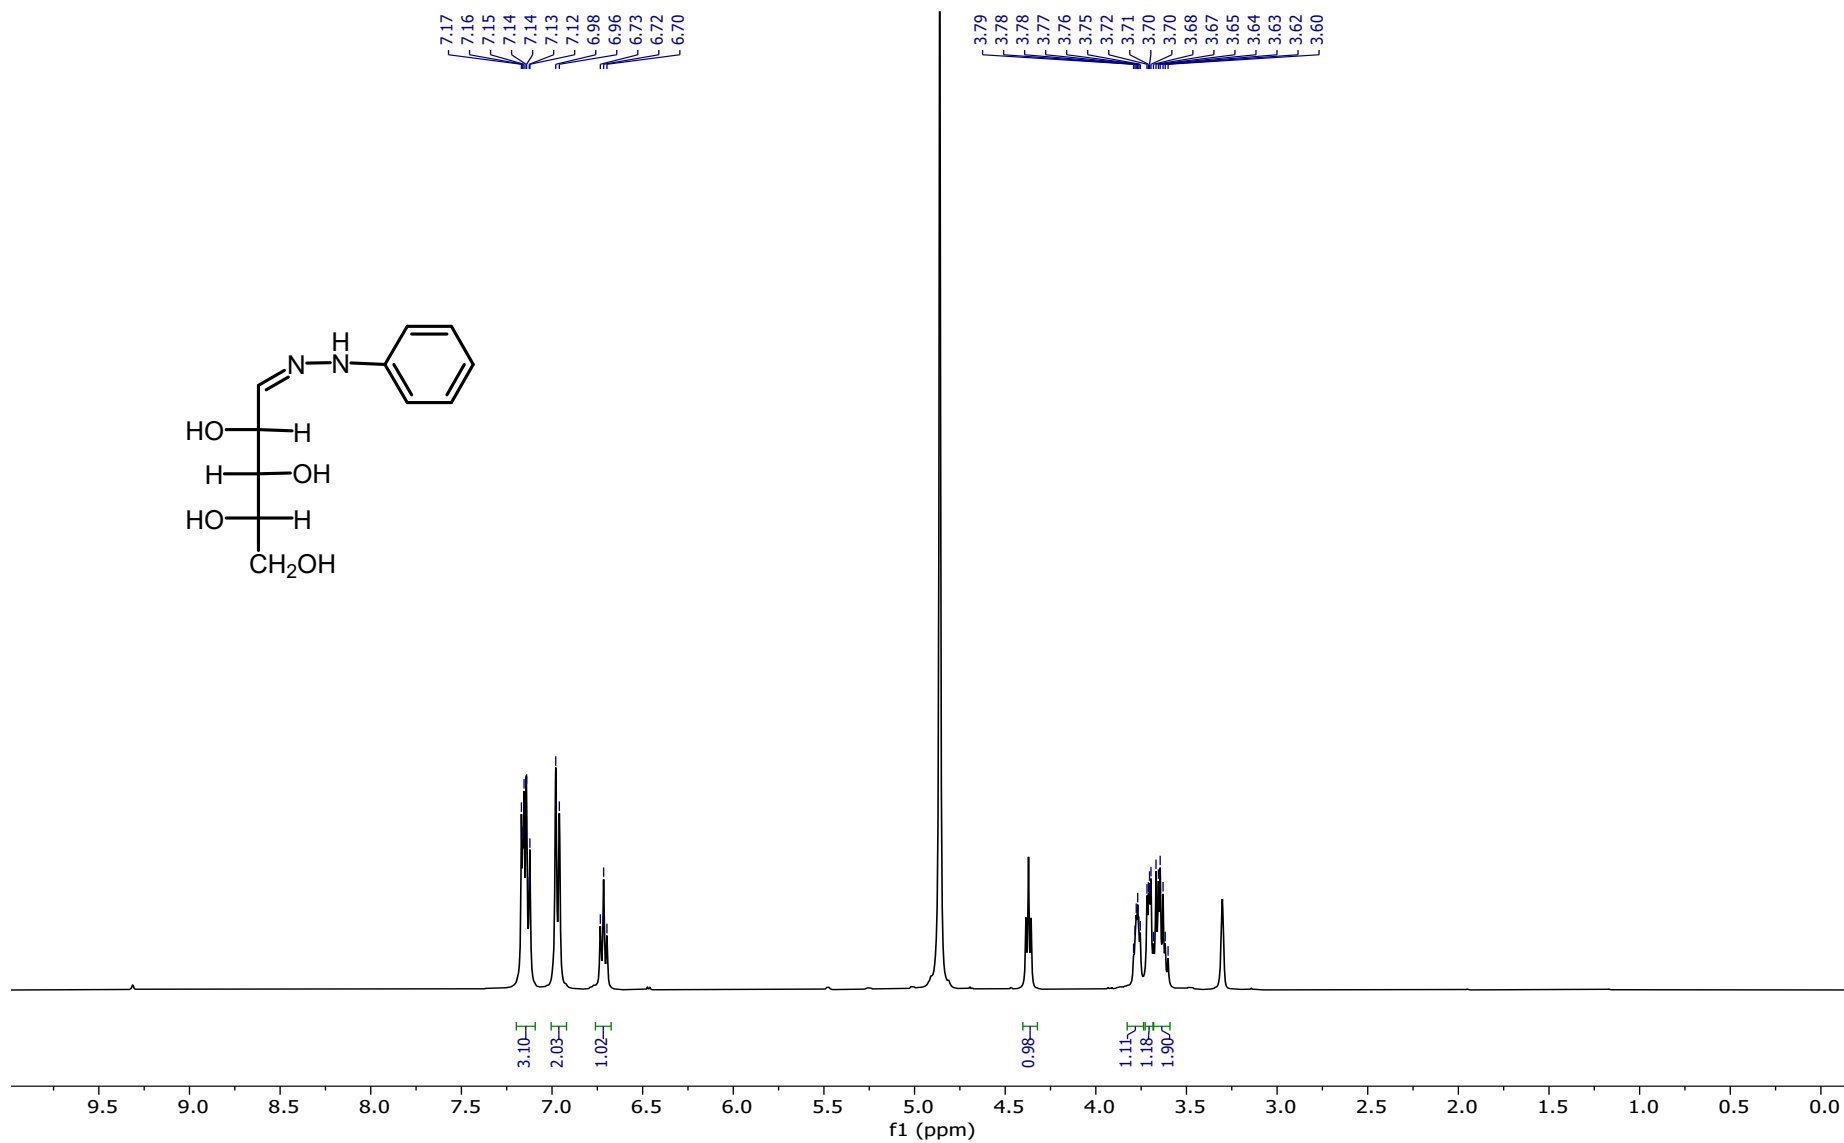

**<sup>1</sup>H NMR Of Compound 8 in CD<sub>3</sub>OD (500 MHz)**

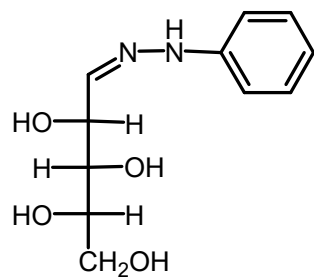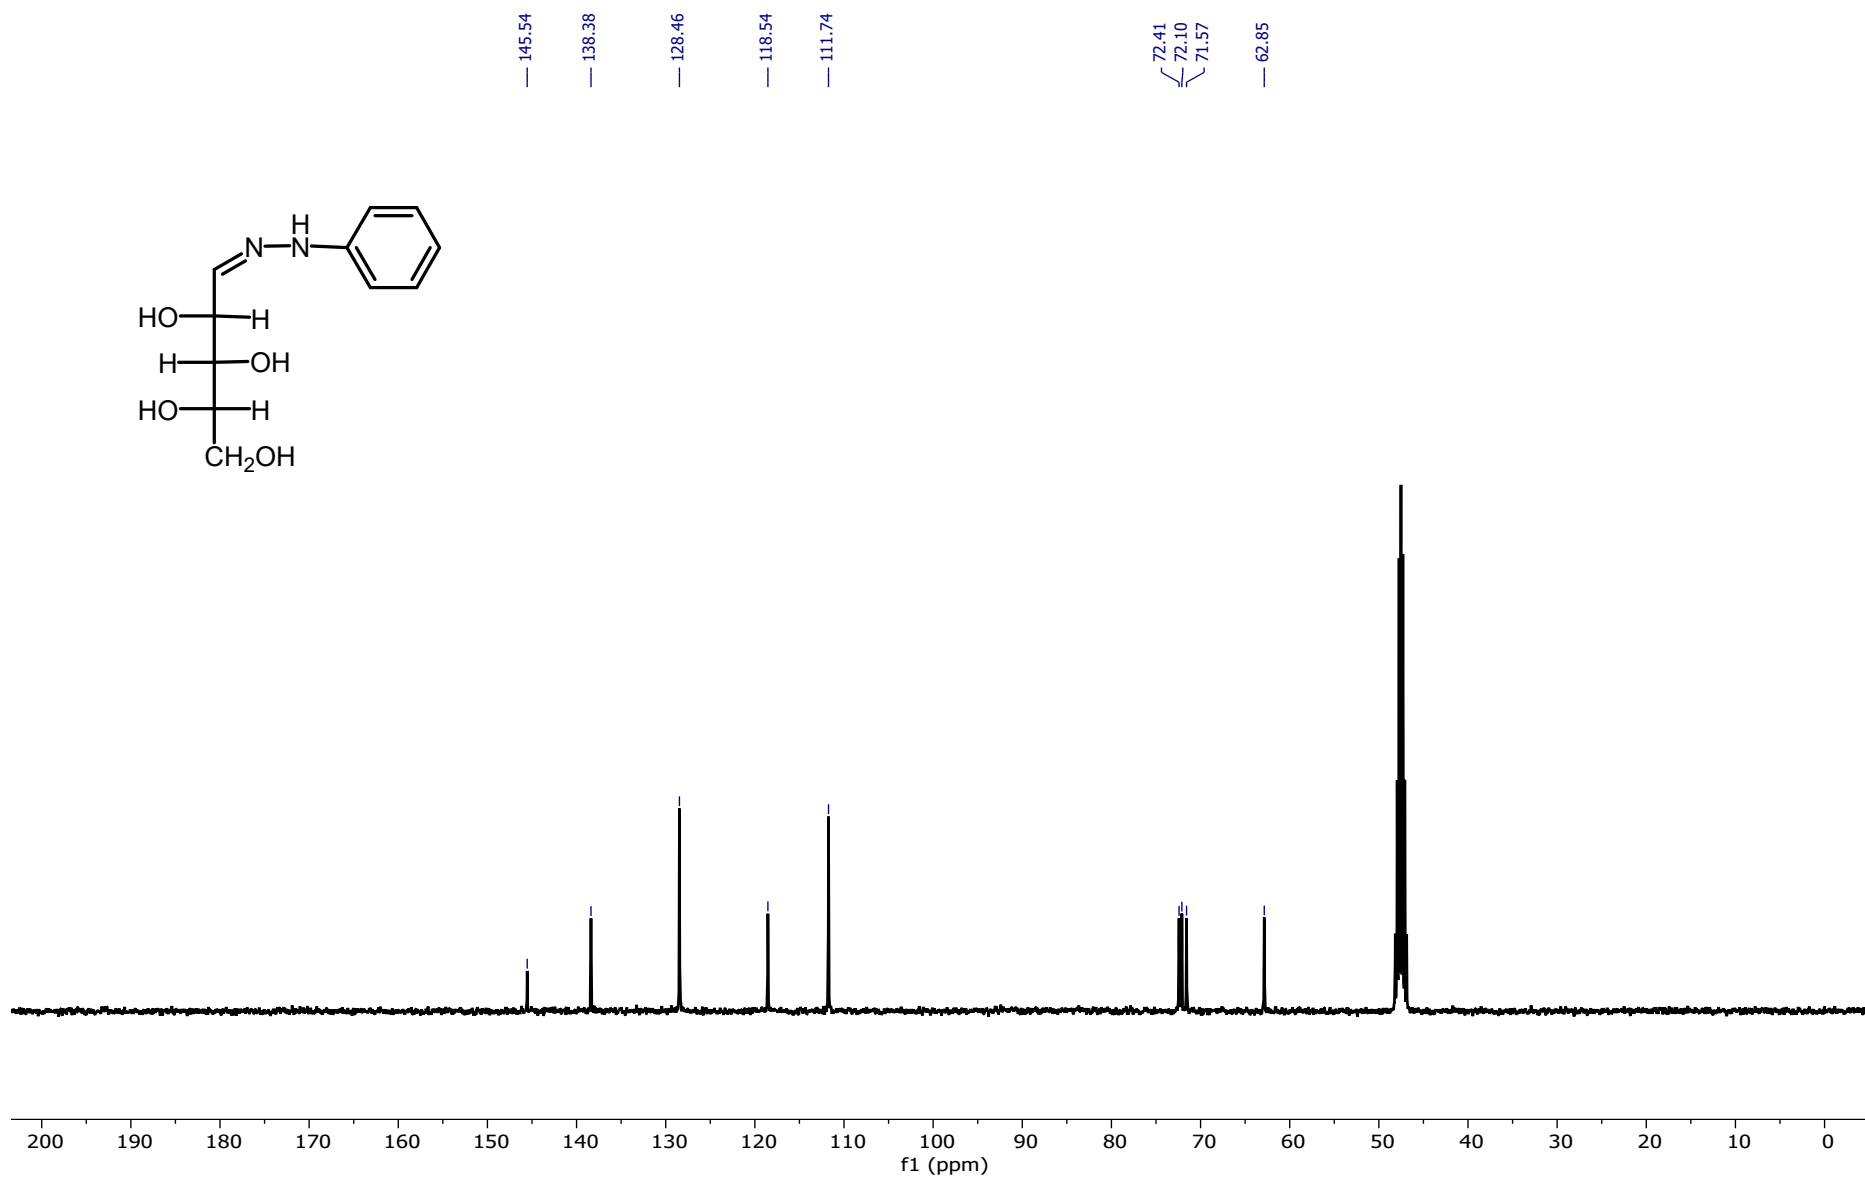

### <sup>13</sup>C NMR Of Compound 8 in CD<sub>3</sub>OD (125 MHz)

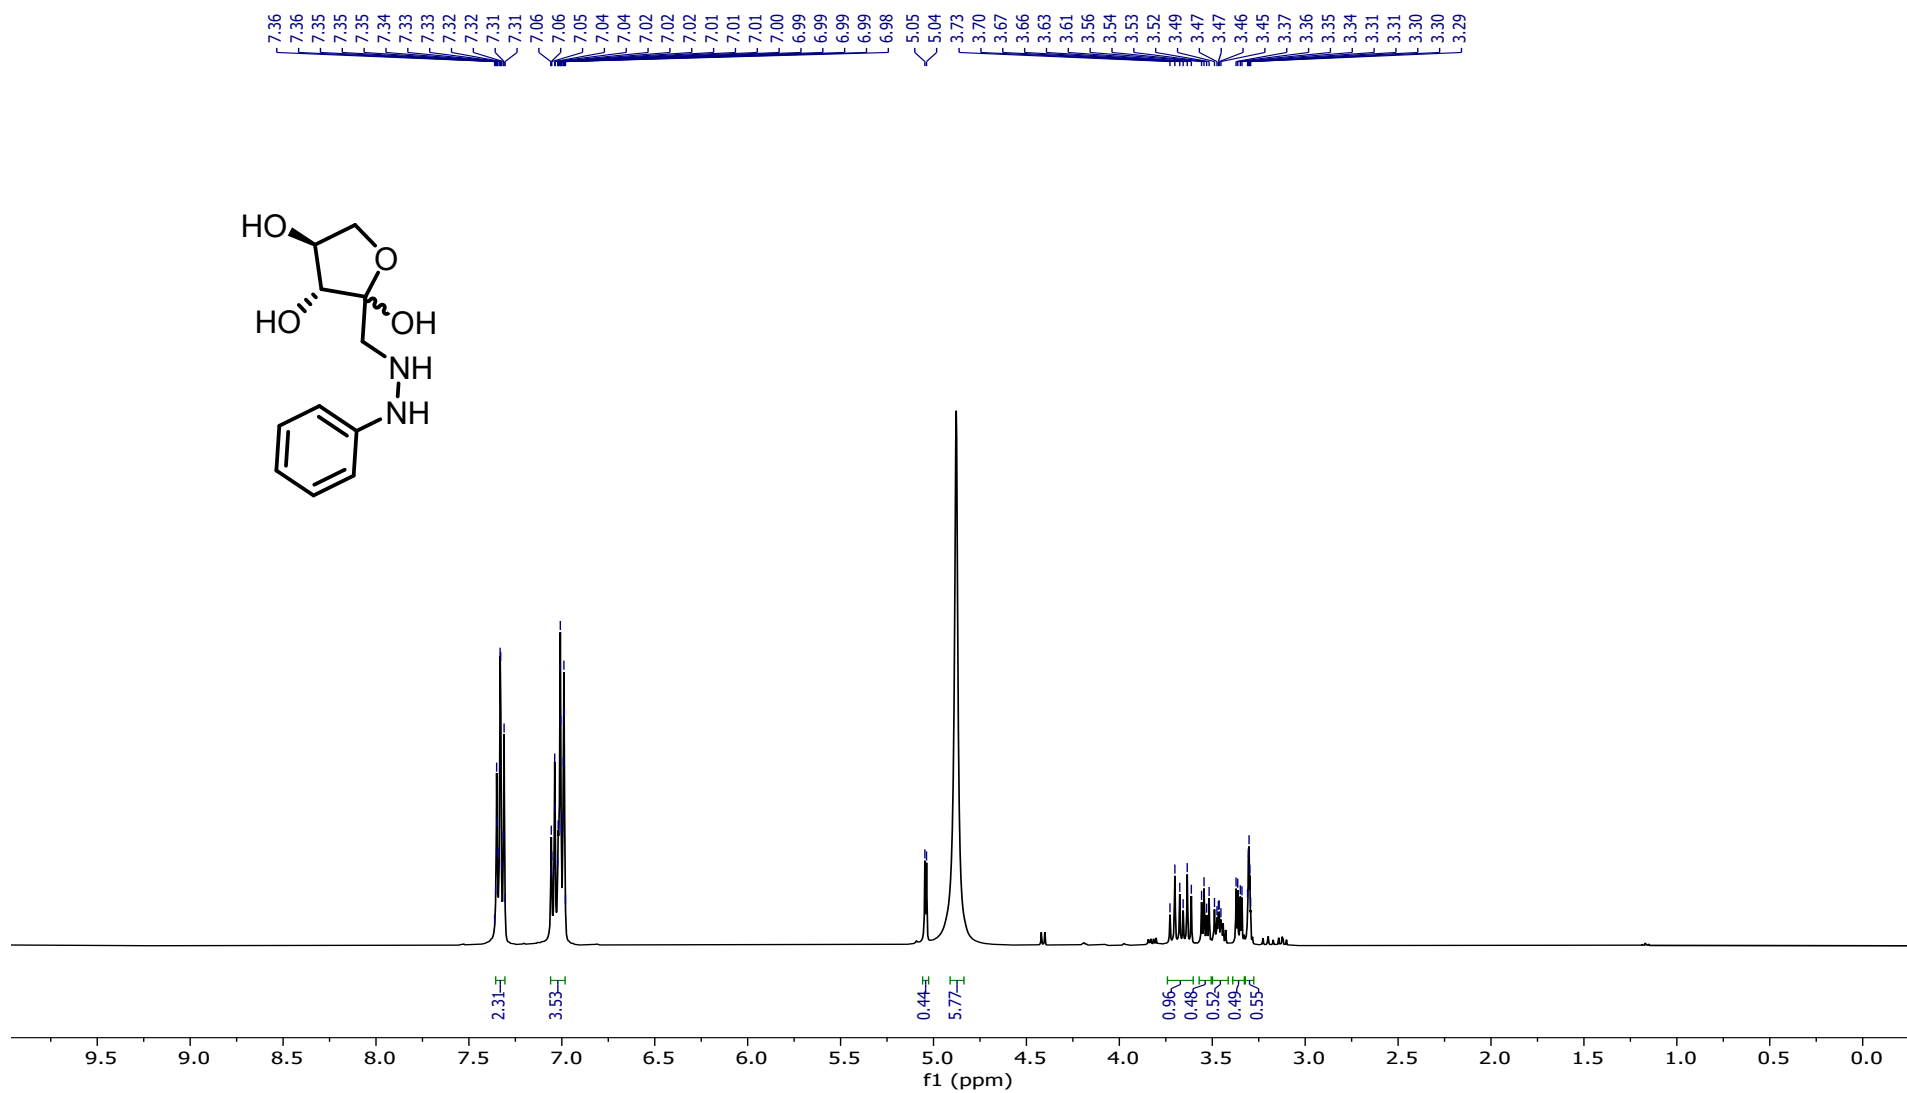

**$^1\text{H}$  NMR Of Compound 9 in  $\text{CD}_3\text{OD}$  (400 MHz)**

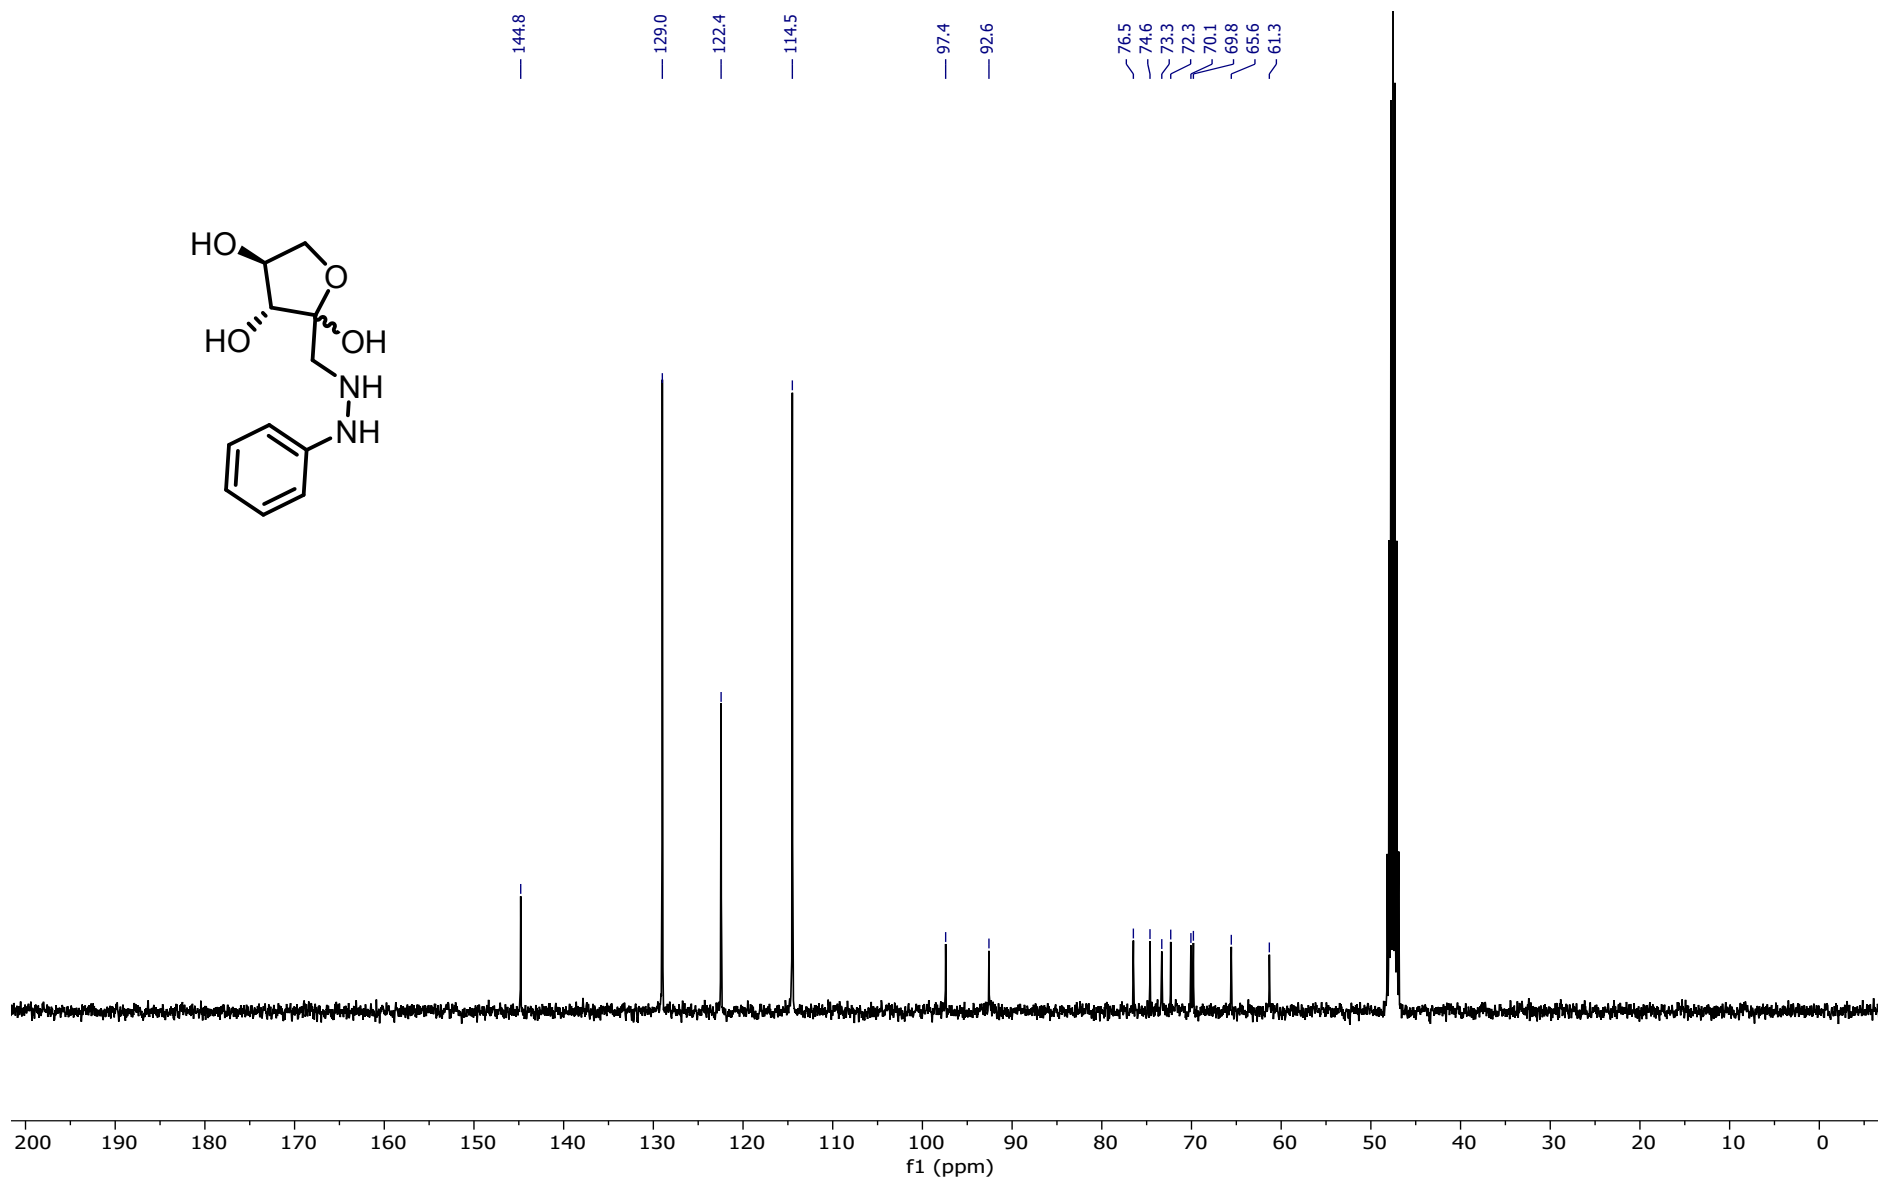

**<sup>13</sup>C NMR Of Compound 9 in CD<sub>3</sub>OD (100 MHz)**

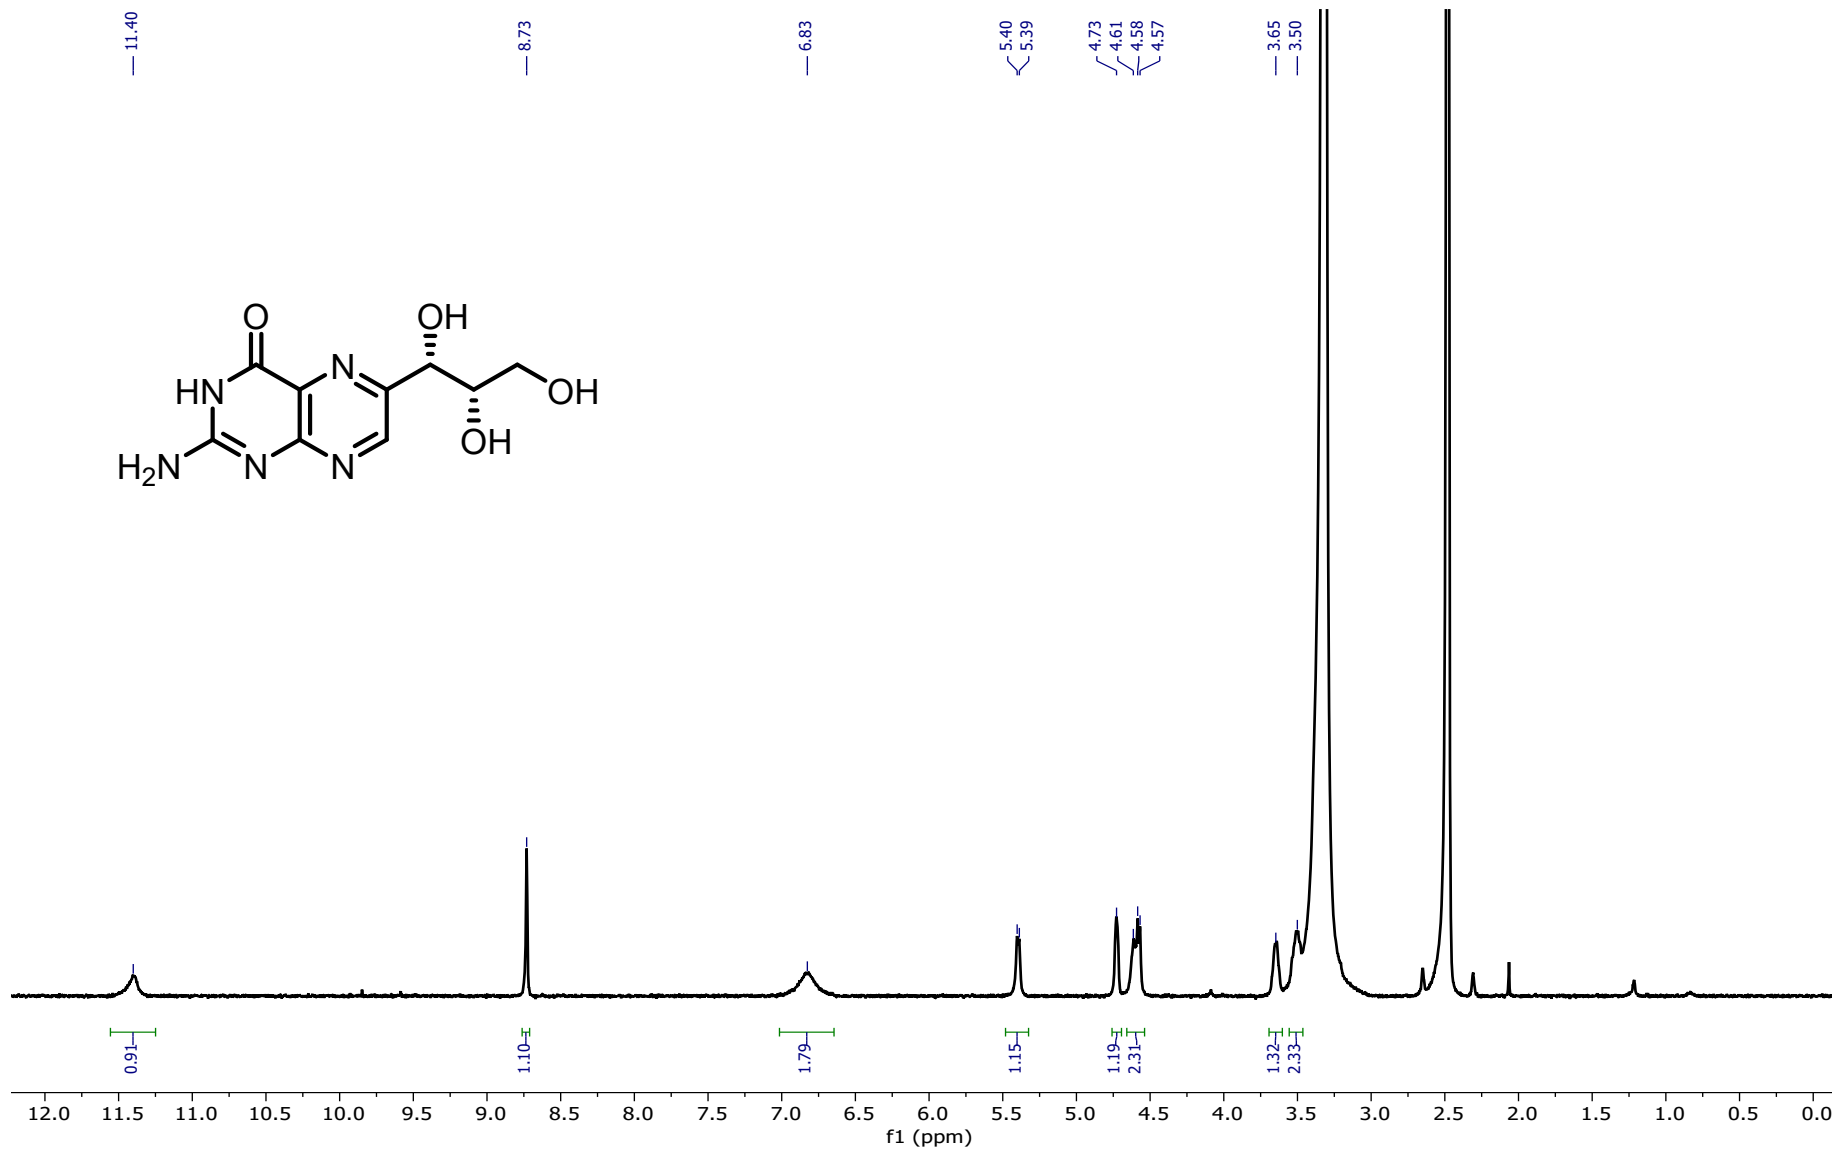

**$^1\text{H}$  NMR Of Compound 4 in DMSO-d6 (125 MHz)**



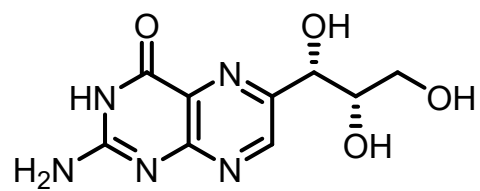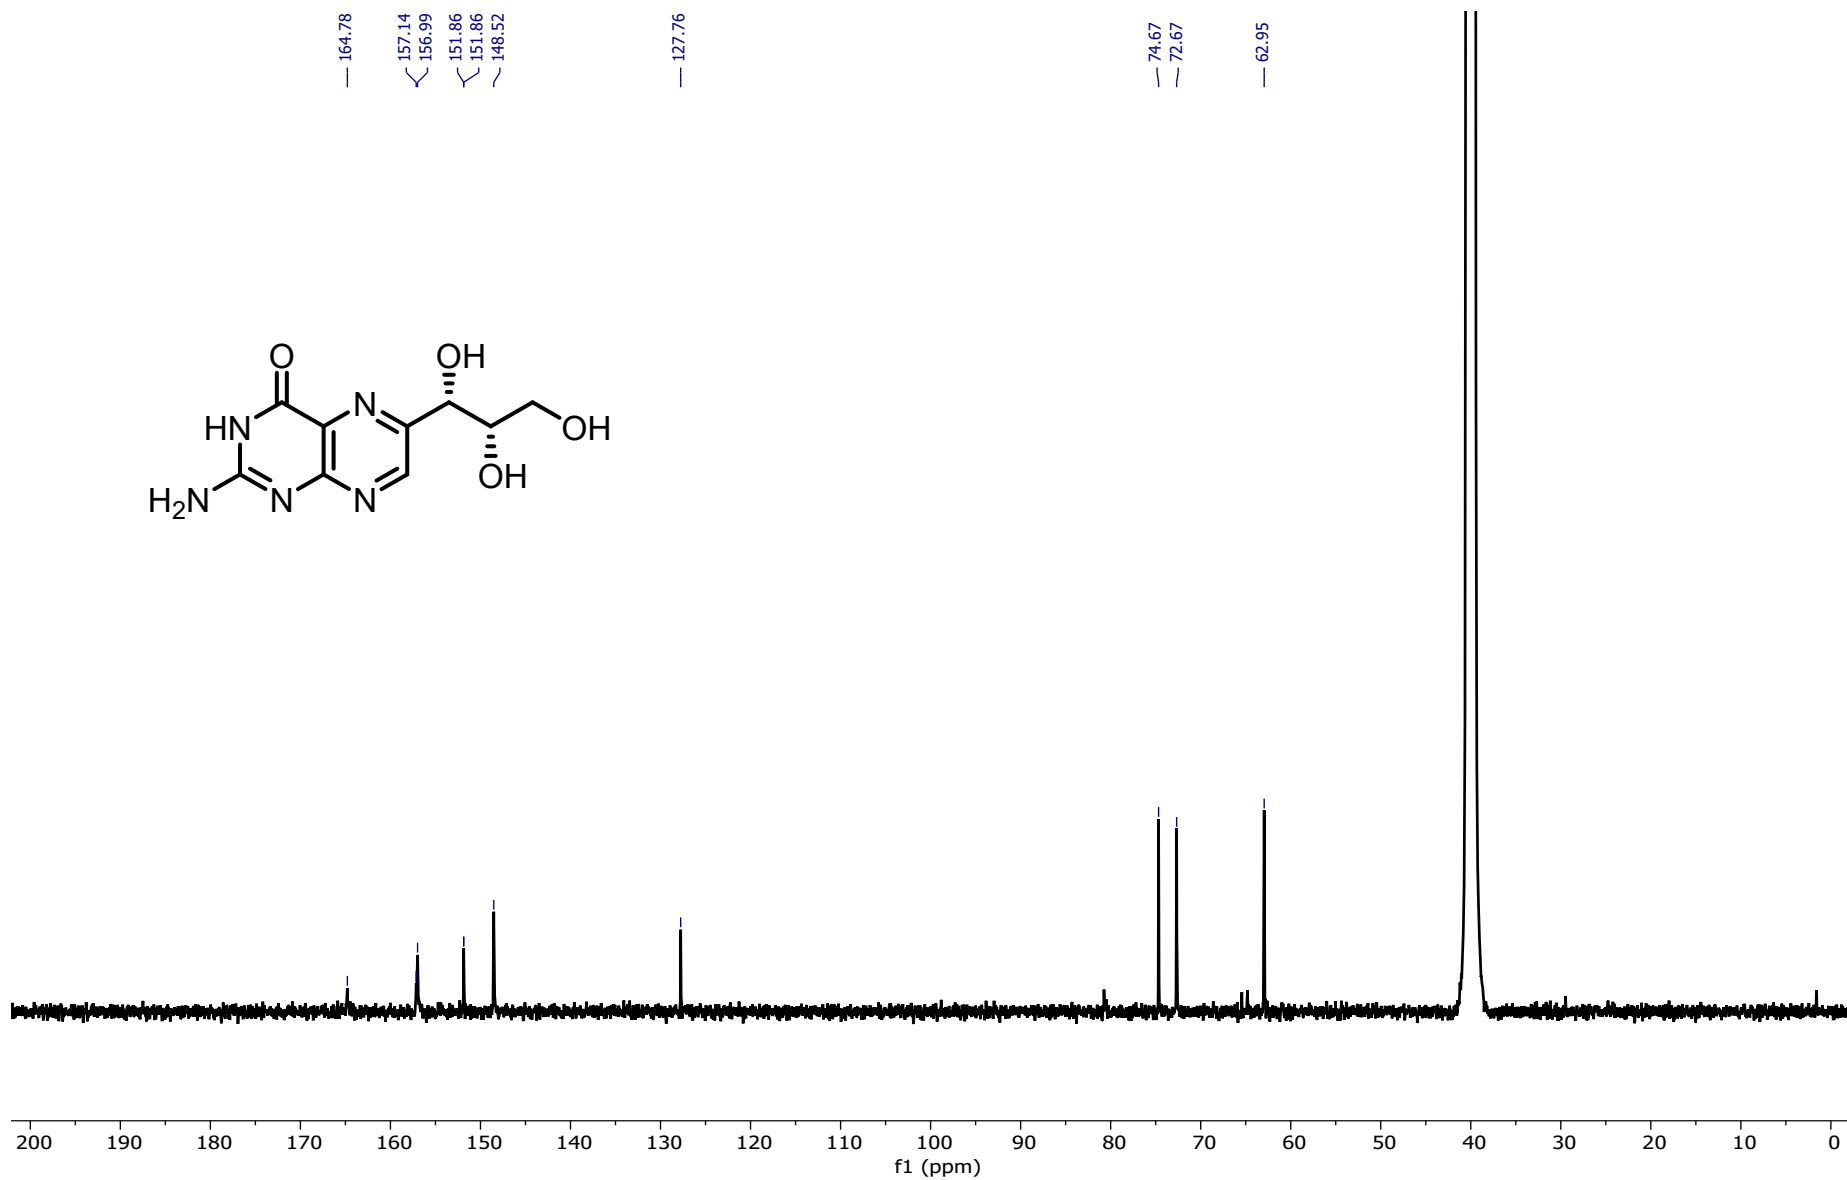

**$^{13}\text{C}$  NMR Of Compound 4 in DMSO-d6 (125 MHz)**

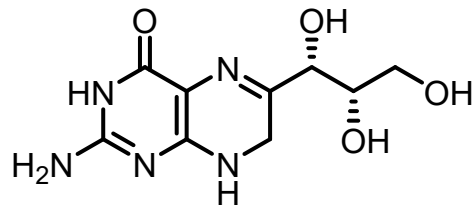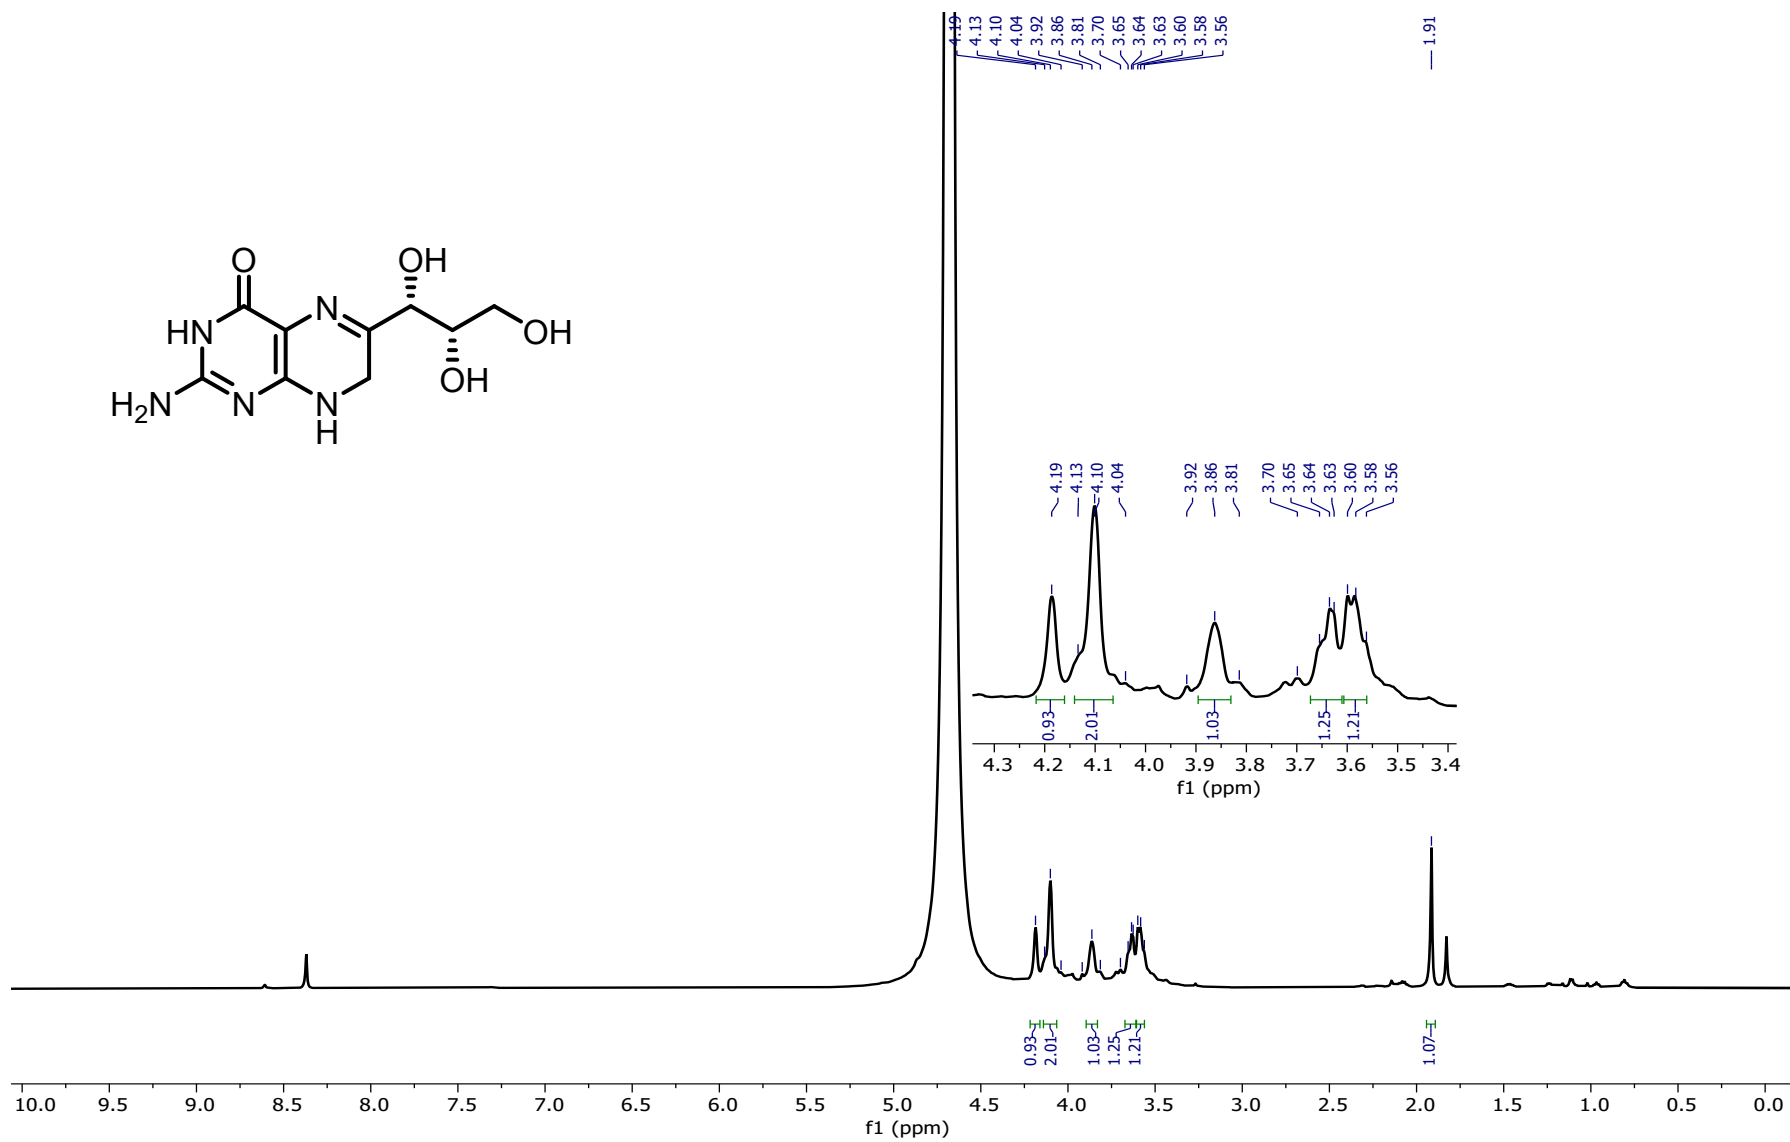

<sup>1</sup>H NMR Of Compound 5 in D<sub>2</sub>O (500 MHz)

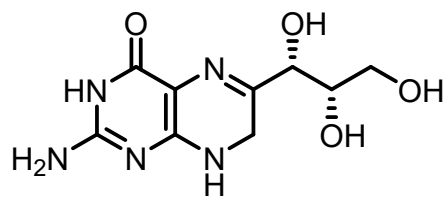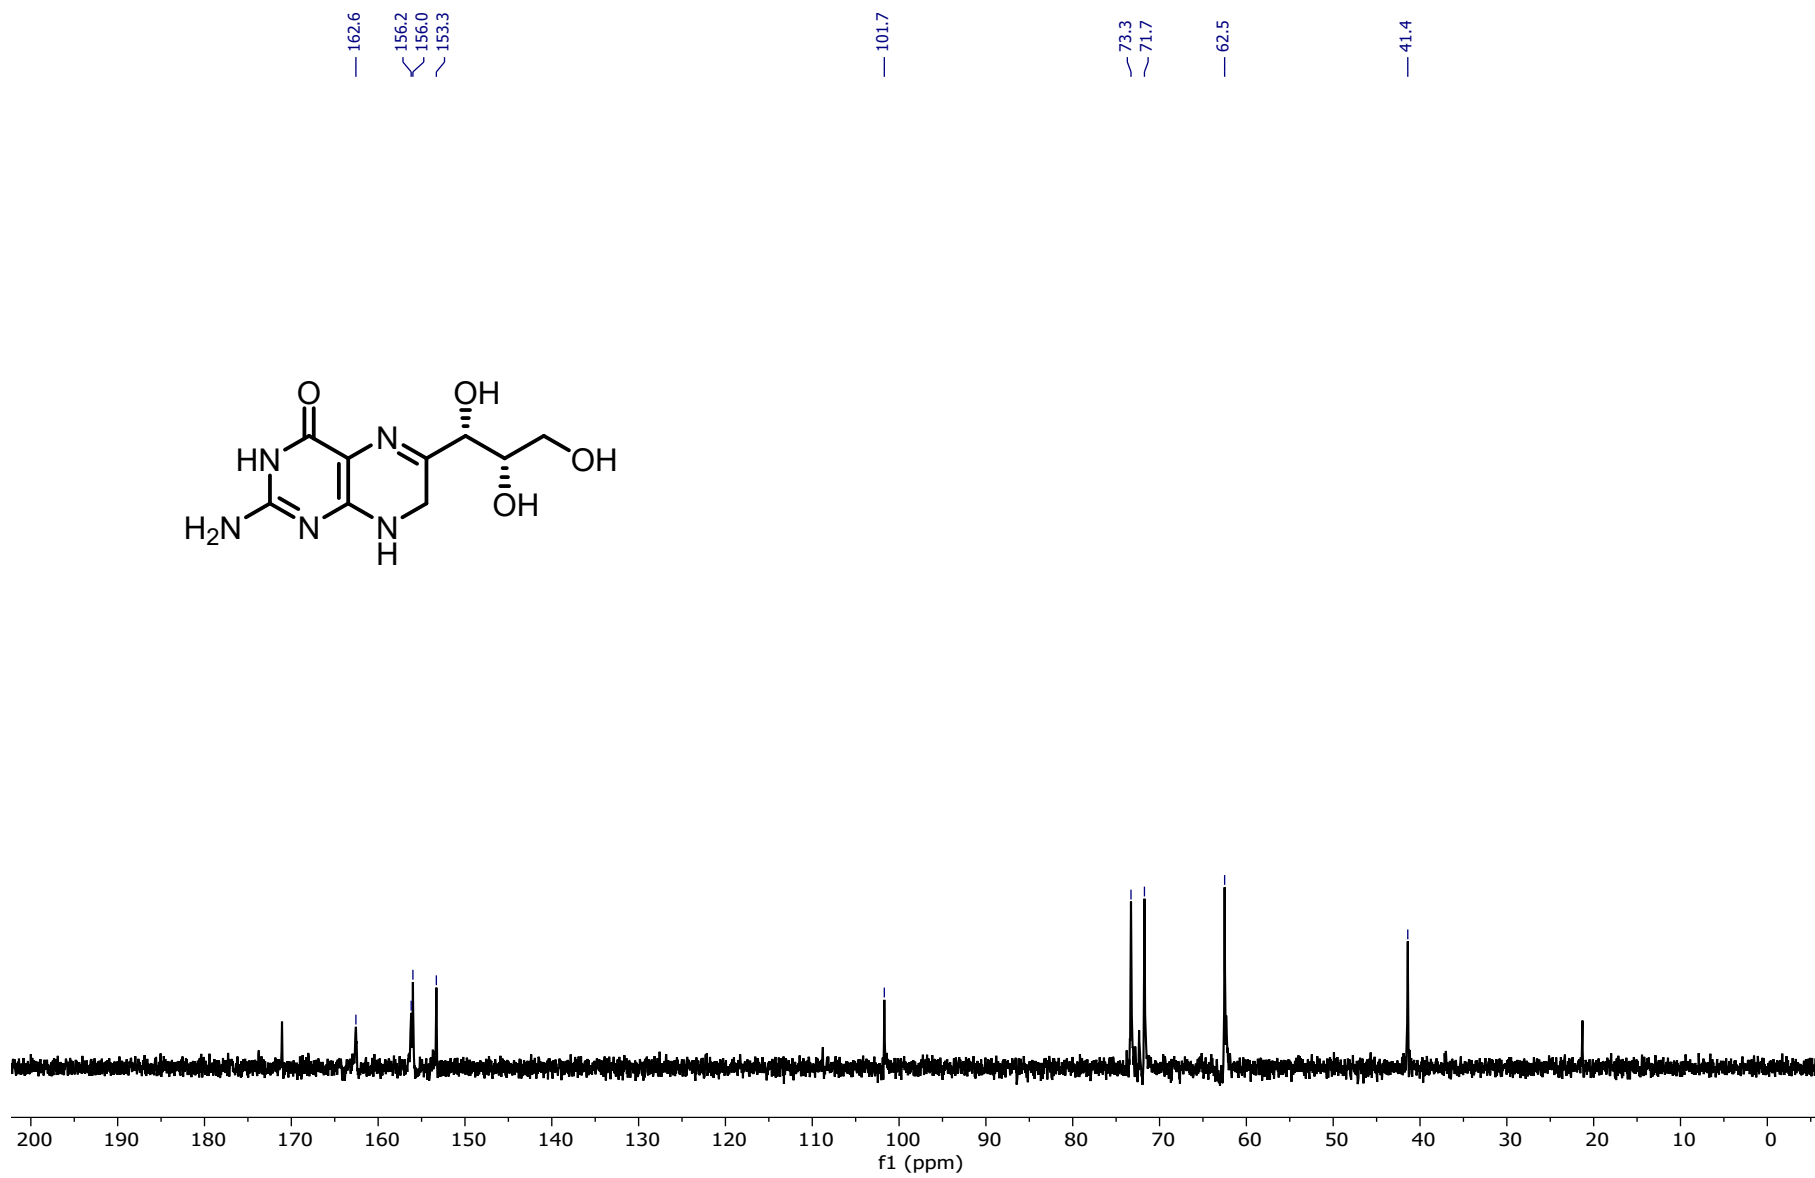

**$^{13}\text{C}$  NMR Of Compound 5 in  $\text{D}_2\text{O}$  (125 MHz)**

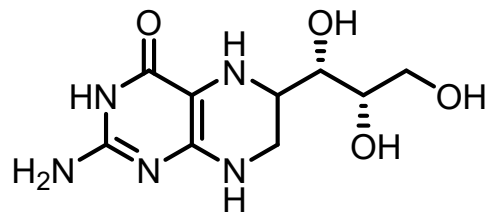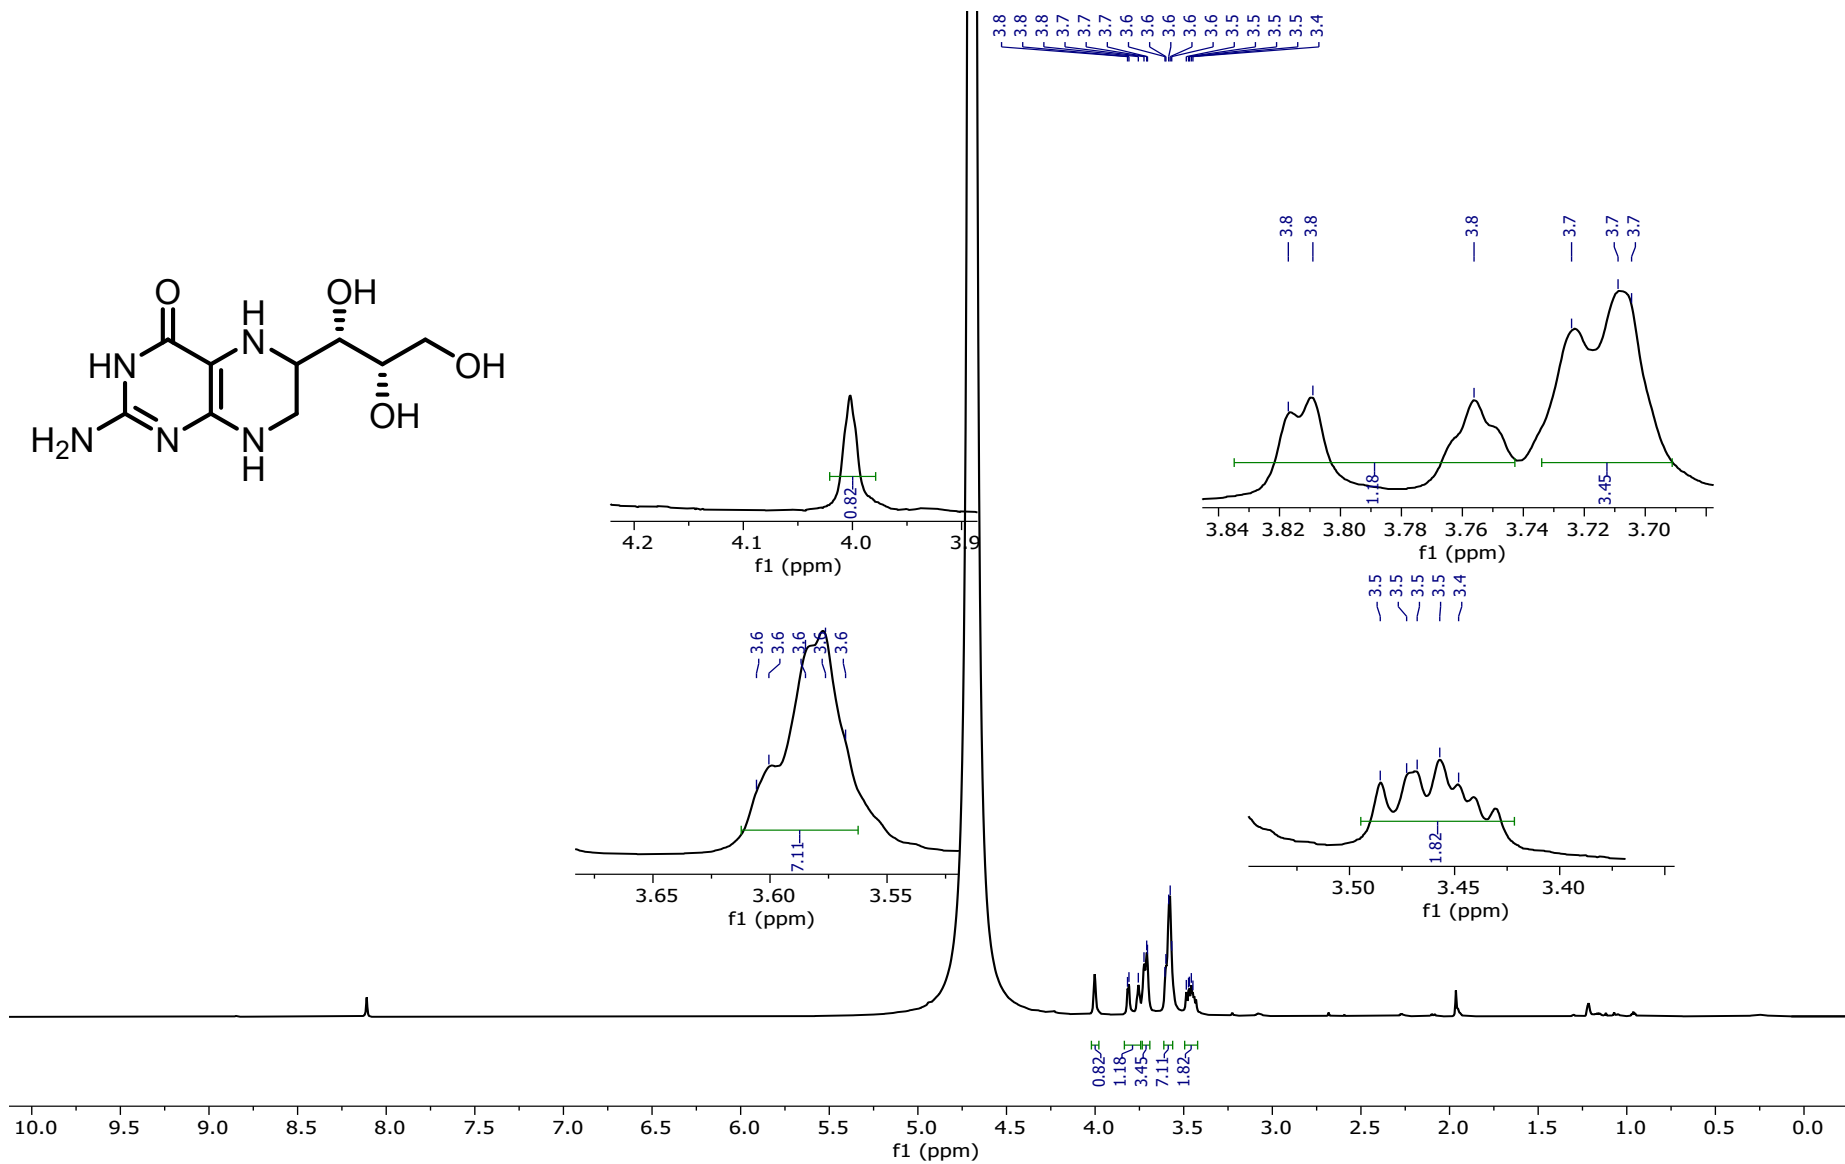

**$^1\text{H}$  NMR Of Compound 6 in  $\text{D}_2\text{O}$  (800 MHz)**

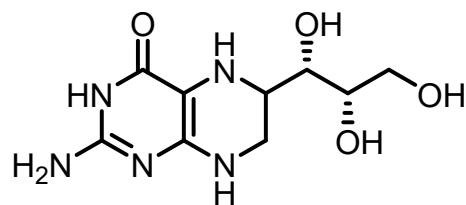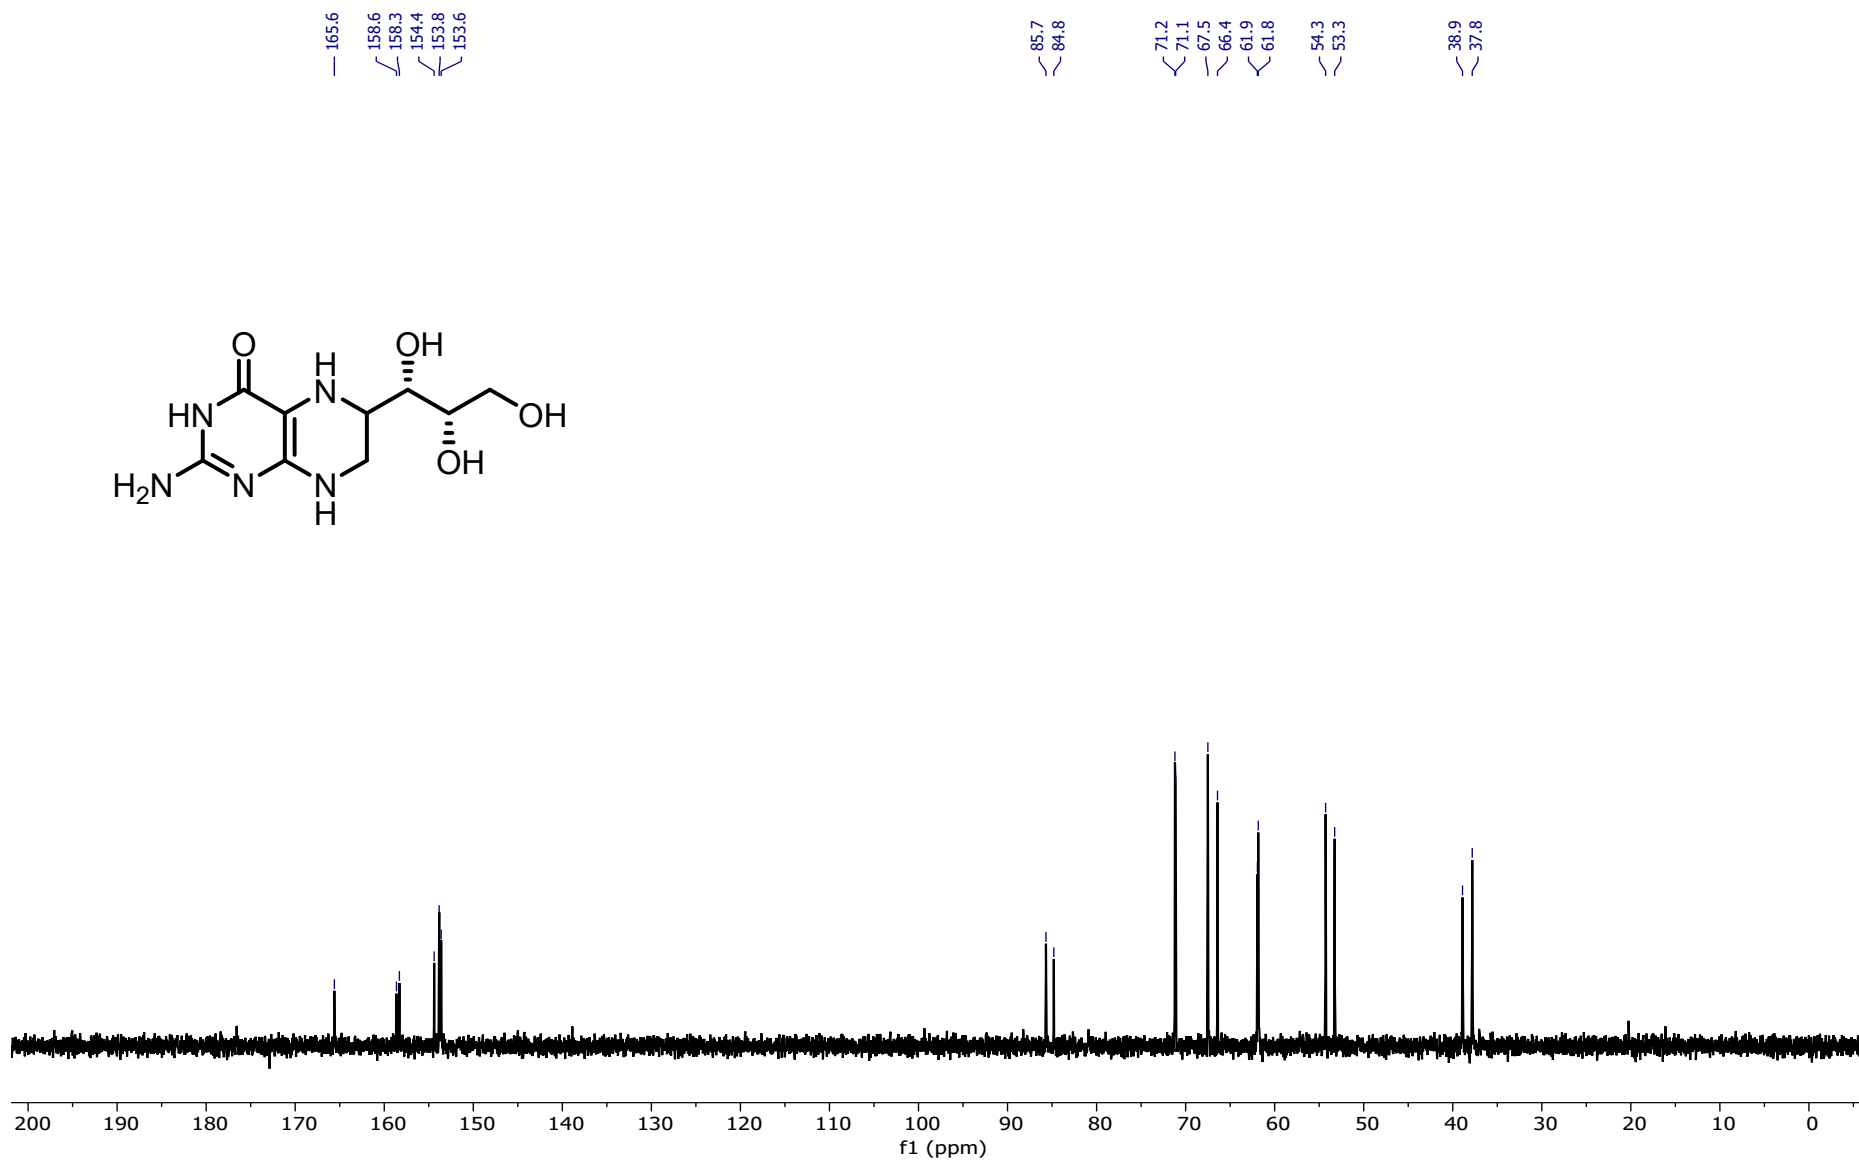



**$^{13}\text{C}$  NMR Of Compound 6 in  $\text{D}_2\text{O}$  (200 MHz)**

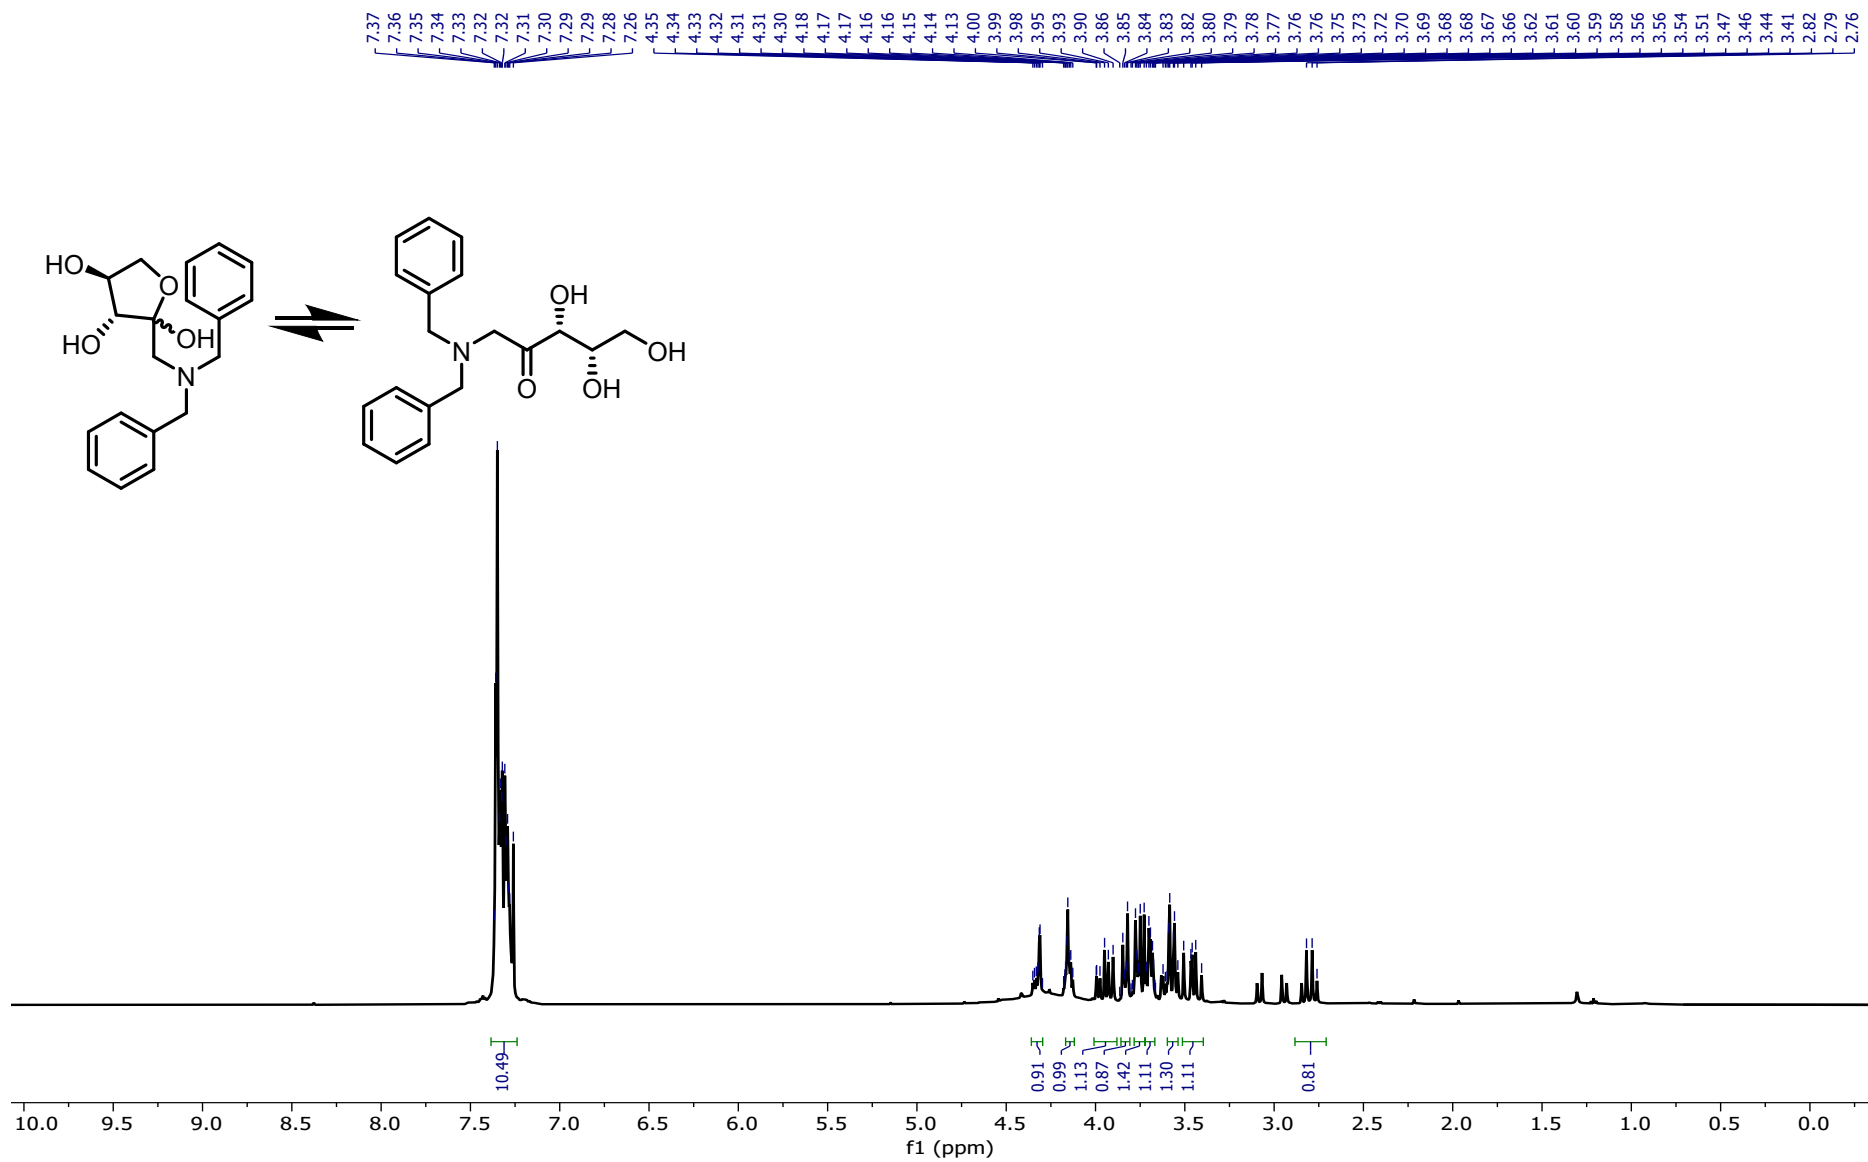

**$^1\text{H}$  NMR Of Compound 13 in  $\text{CDCl}_3$  (500 MHz)**

— 209.7

137.6  
137.4  
129.7  
129.5  
129.4  
128.9  
128.8  
128.7  
128.6  
128.6  
127.7  
127.6  
127.6  
104.1  
102.6  
81.6  
80.0  
77.5  
77.4  
77.3  
77.2  
77.0  
76.9  
76.0  
74.9  
71.5  
71.4  
64.1  
60.3  
59.1  
58.9  
58.9  
57.4  
56.4

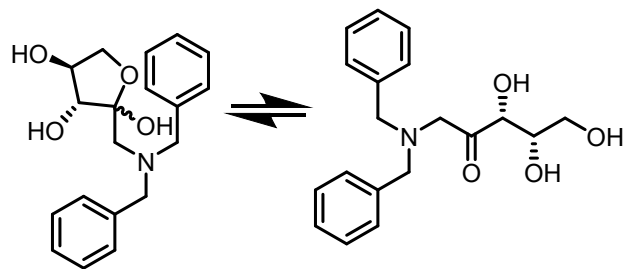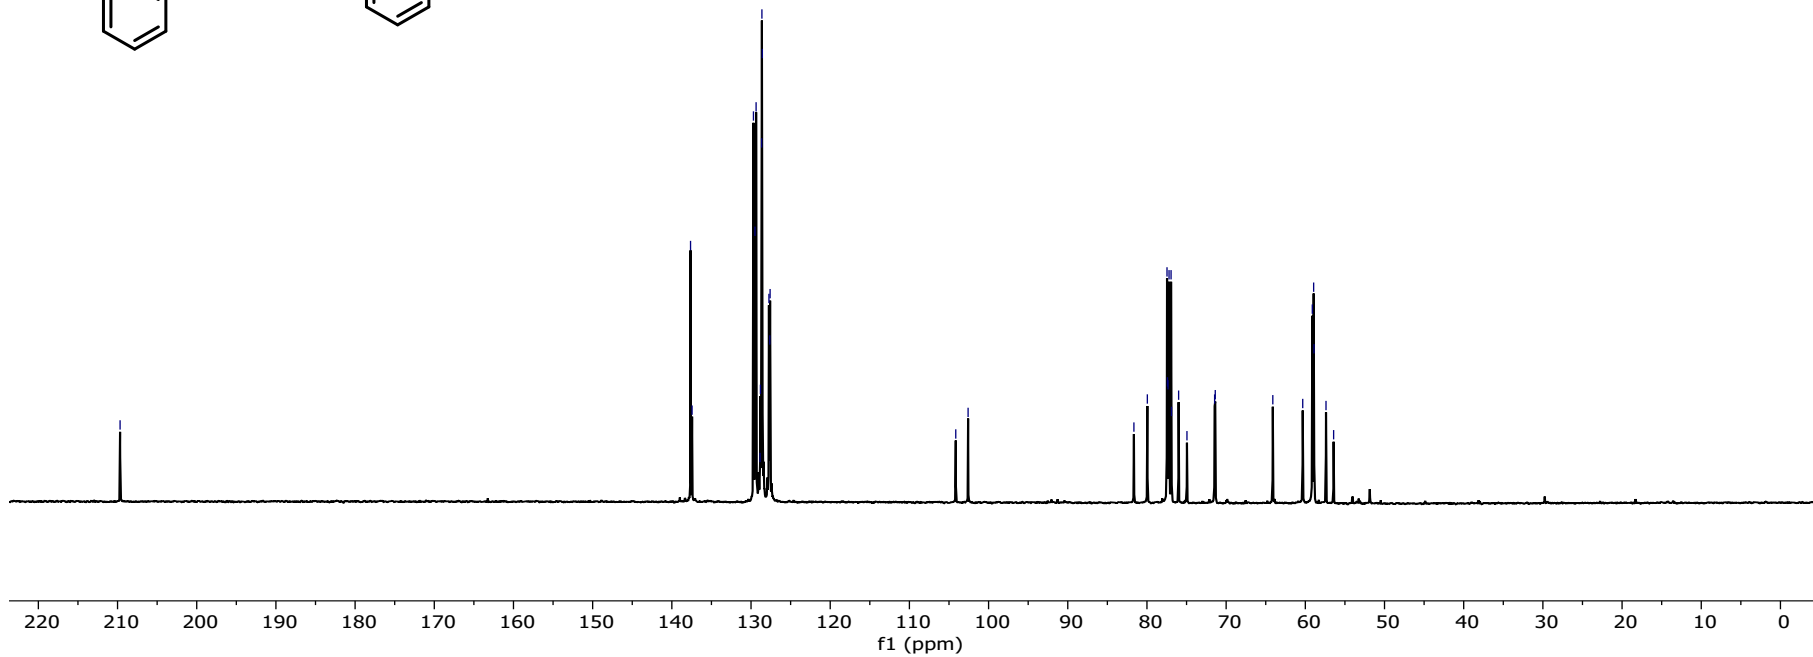

**<sup>13</sup>C NMR Of Compound 13 in CDCl<sub>3</sub> (125 MHz)**

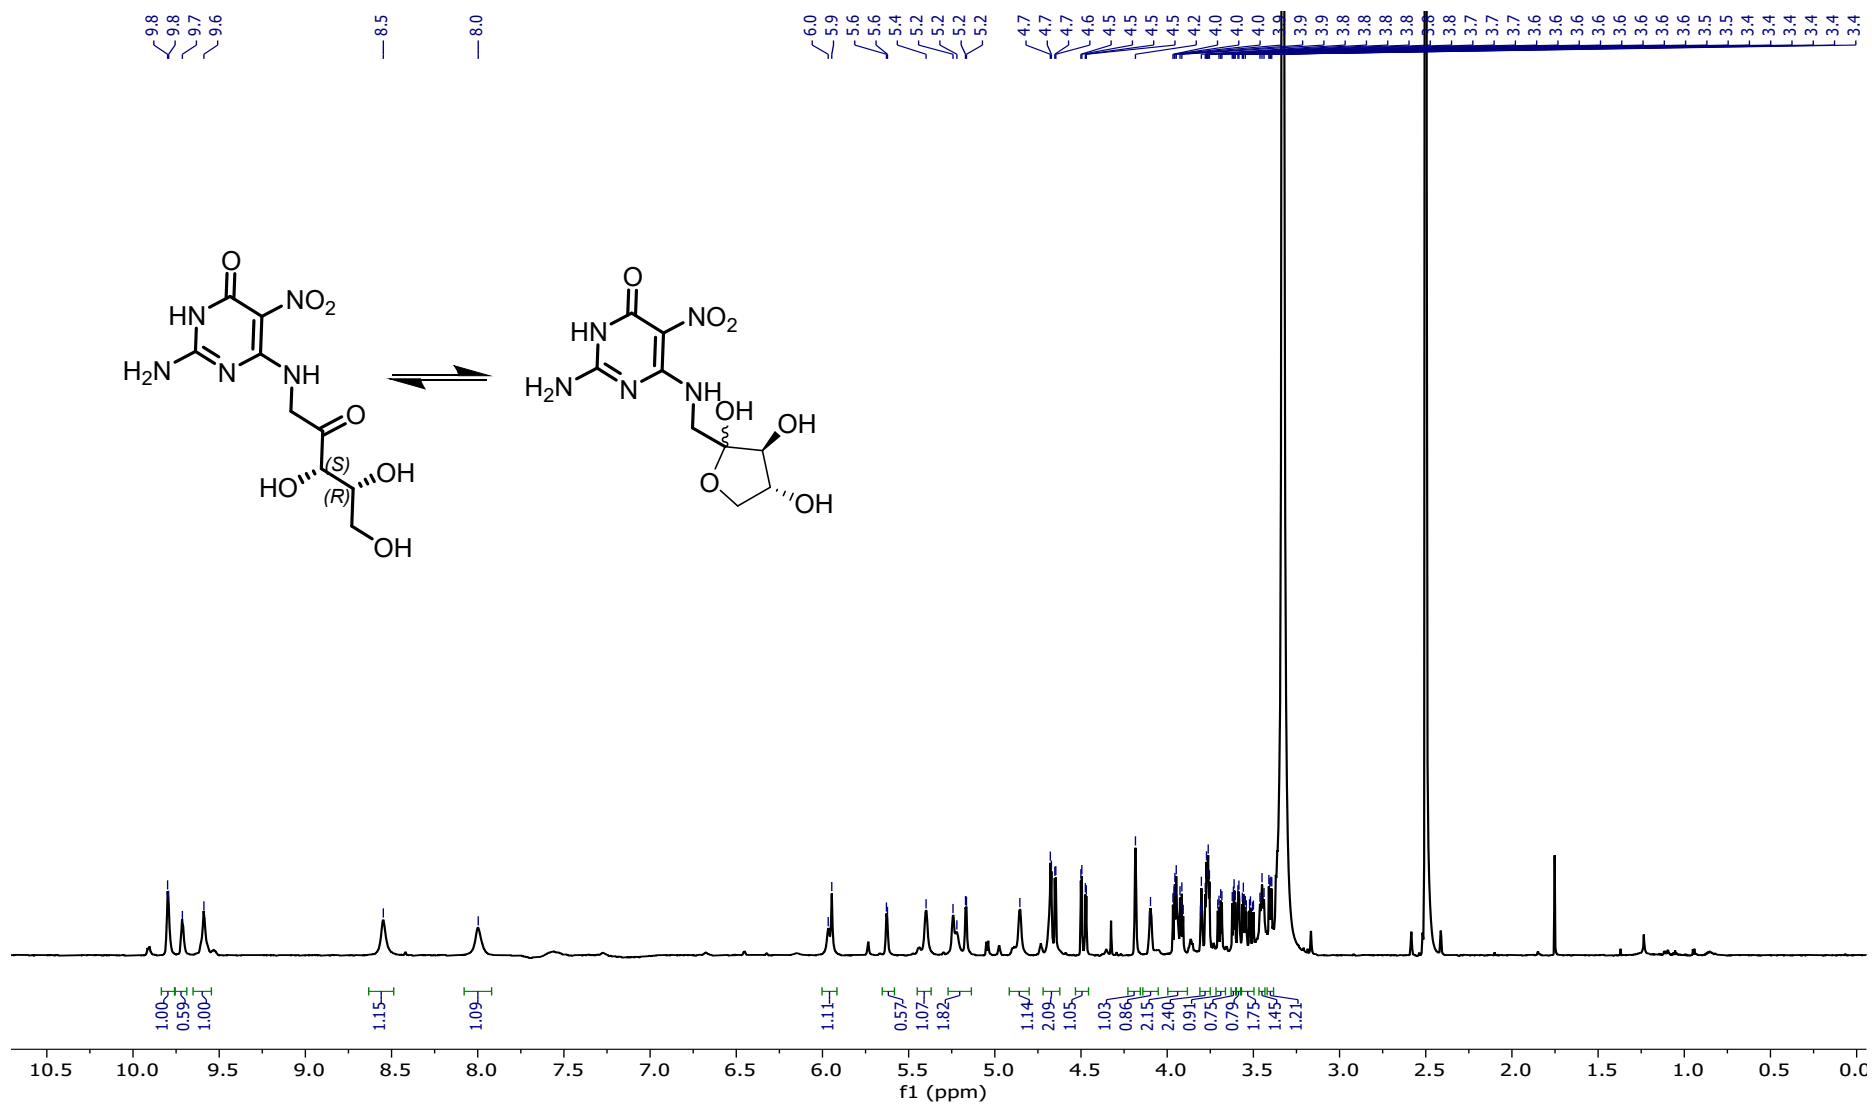

**<sup>1</sup>H NMR Of Compound 15 in DMSO-d<sub>6</sub> (800 MHz)**

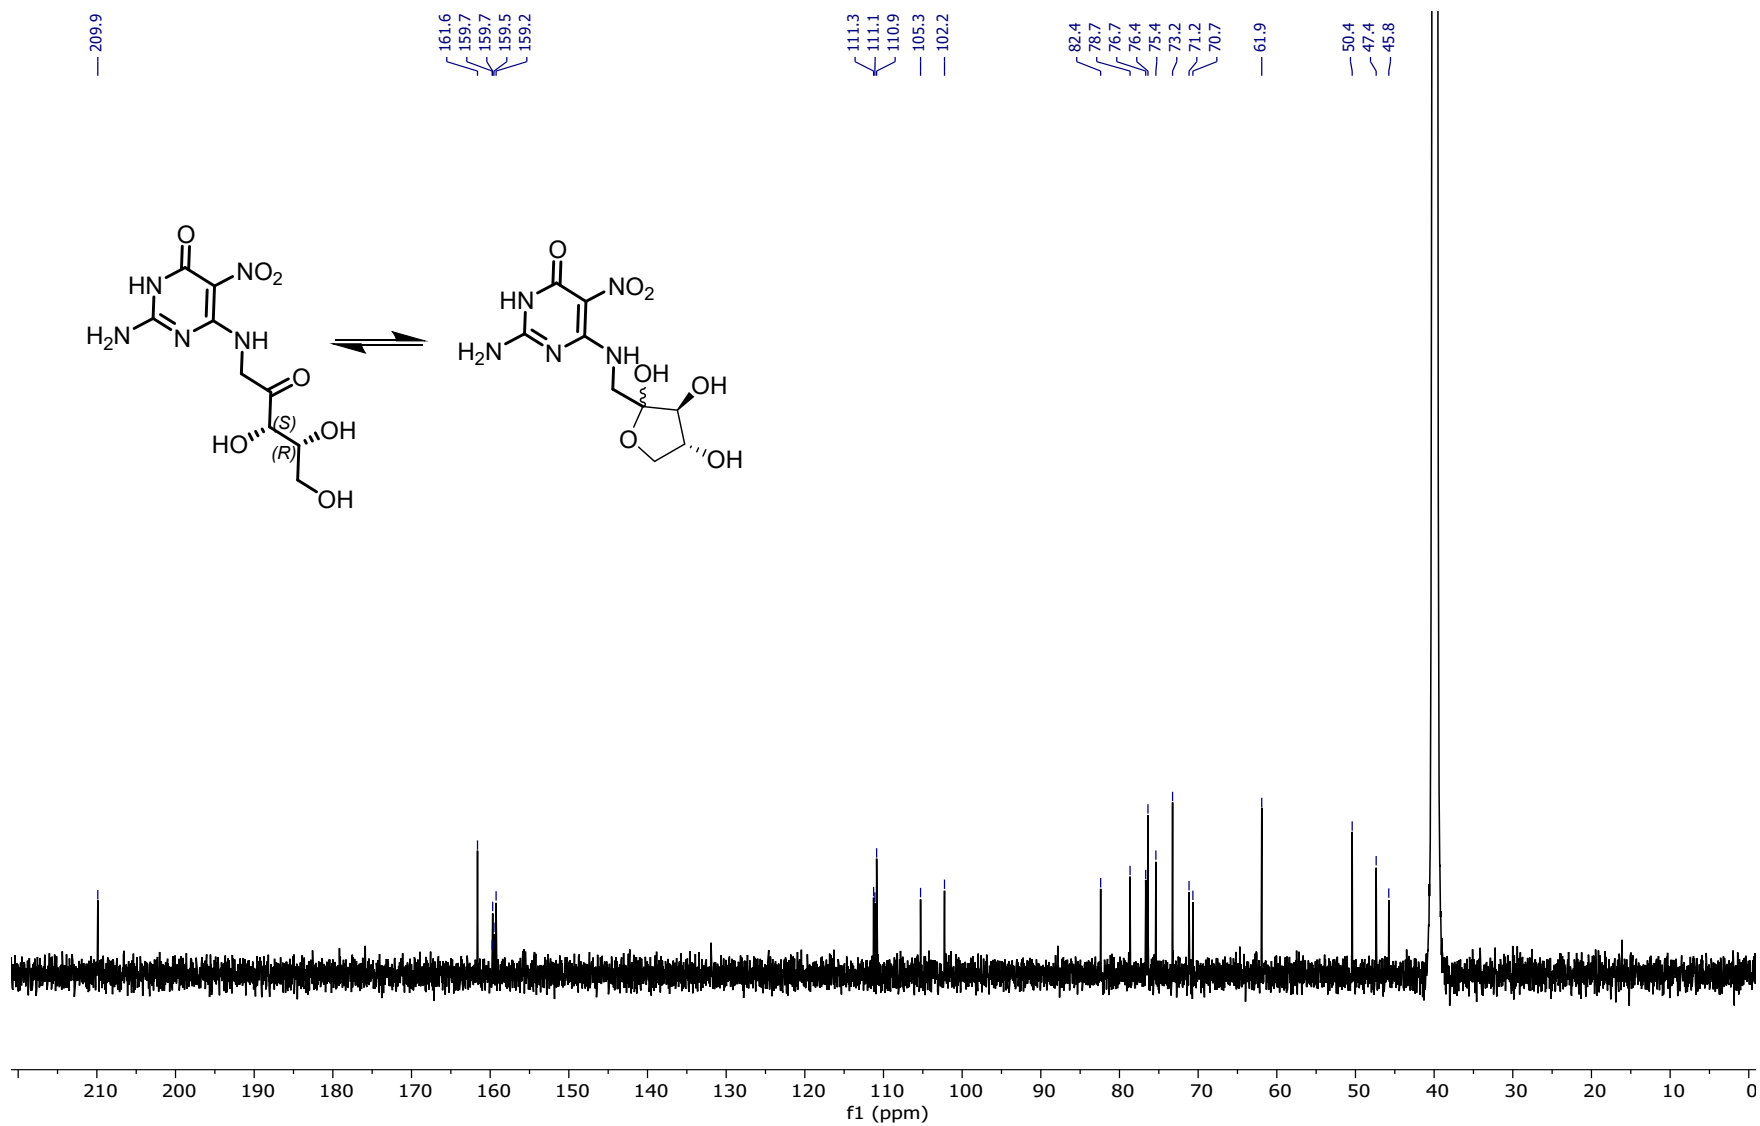

$^{13}\text{C}$  NMR Of Compound 15 in  $\text{DMSO-d}_6$  (200 MHz)

RIC-NS-13270\_ESI+\_MEOH\_SN-03-67 #1-36 RT: 0.00-0.50 AV: 36 NL: 8.19E6  
T: FTMS + p ESI Full ms [100.00-800.00]

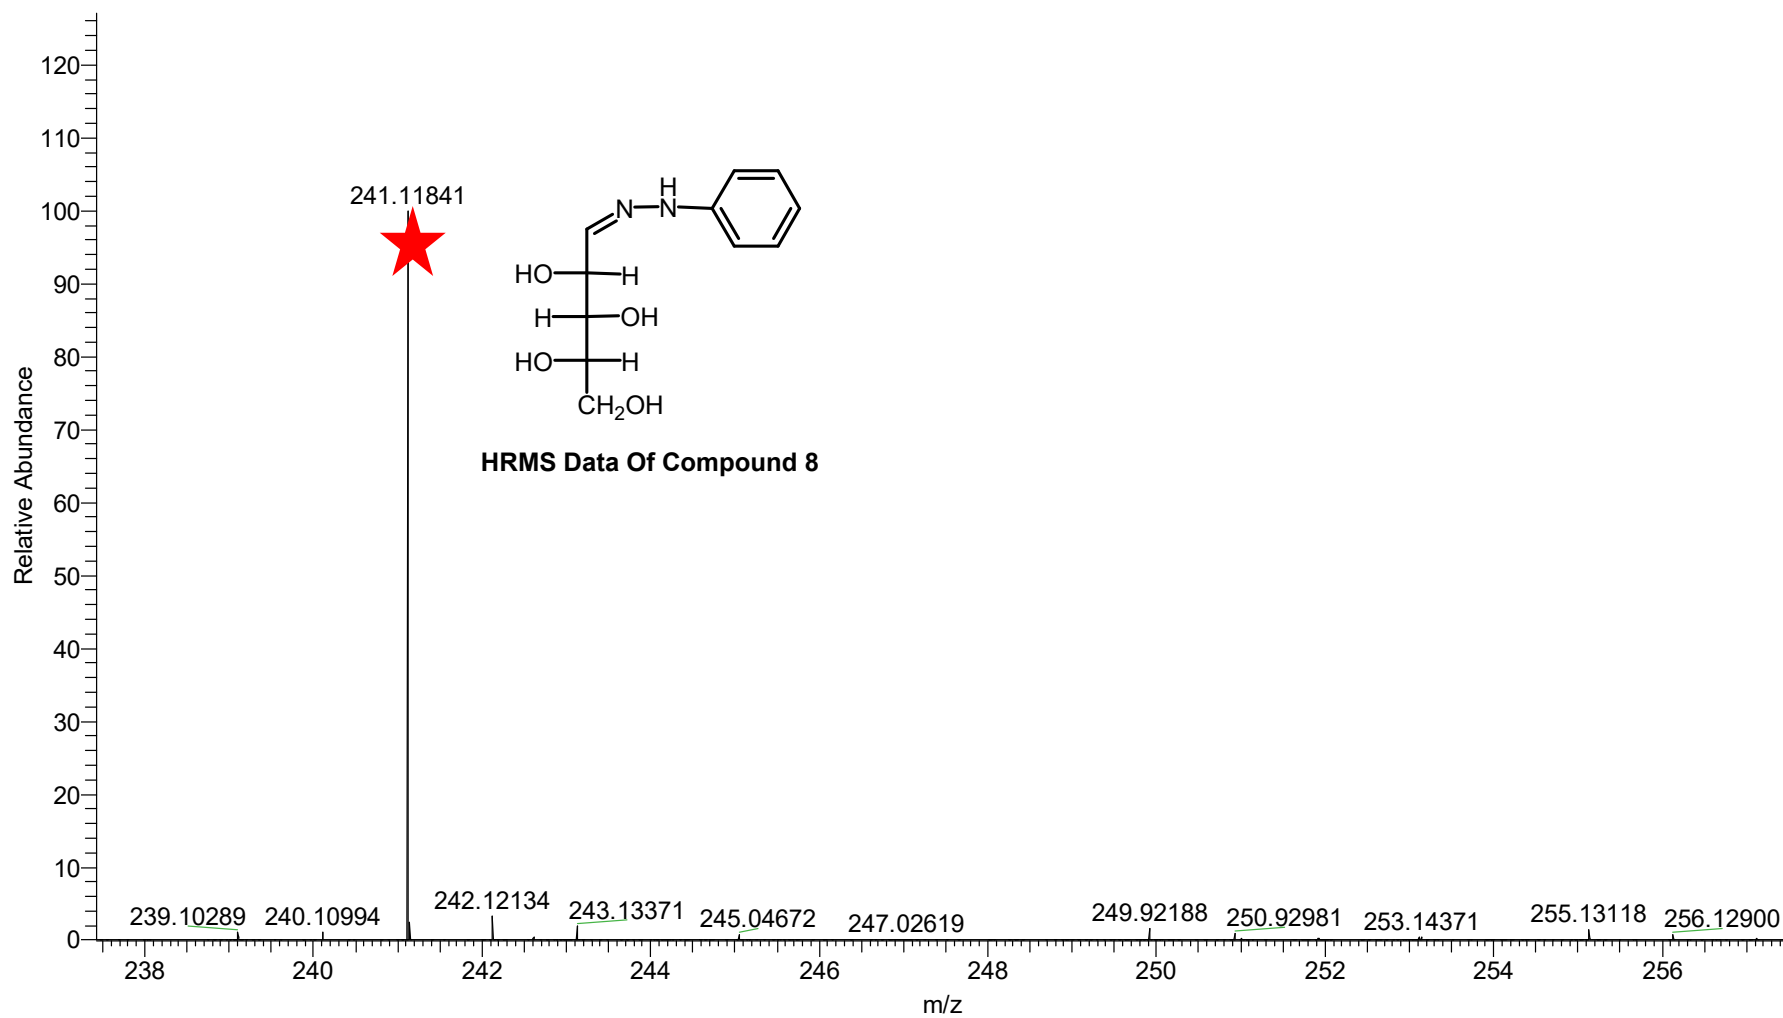

RIC-AS-13266\_ESI+\_MEOH\_253 #1-36 RT: 0.00-0.50 AV: 36 NL: 3.87E7  
T: FTMS + p ESI Full ms [100.00-800.00]

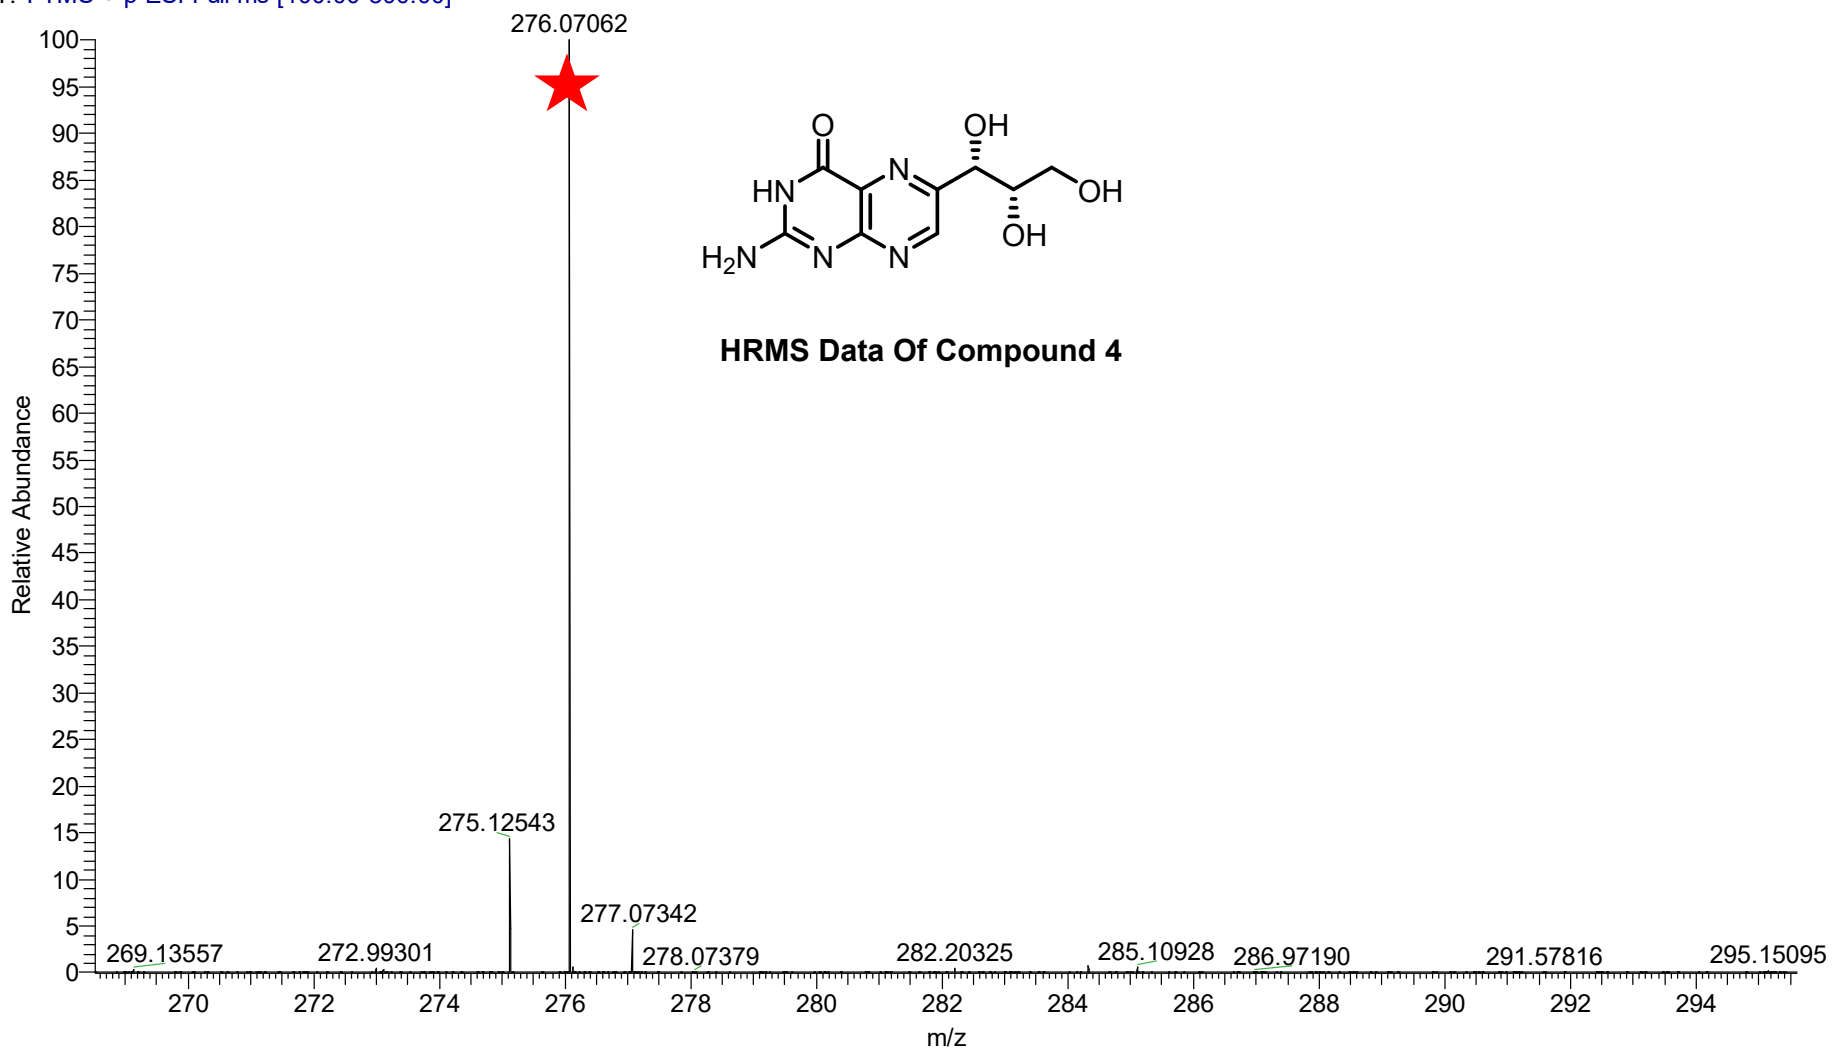



RIC-AS-13266\_ESI+\_MEOH\_255 #1-35 RT: 0.01-0.49 AV: 35 NL: 1.96E6  
T: FTMS + p ESI Full ms [100.00-800.00]

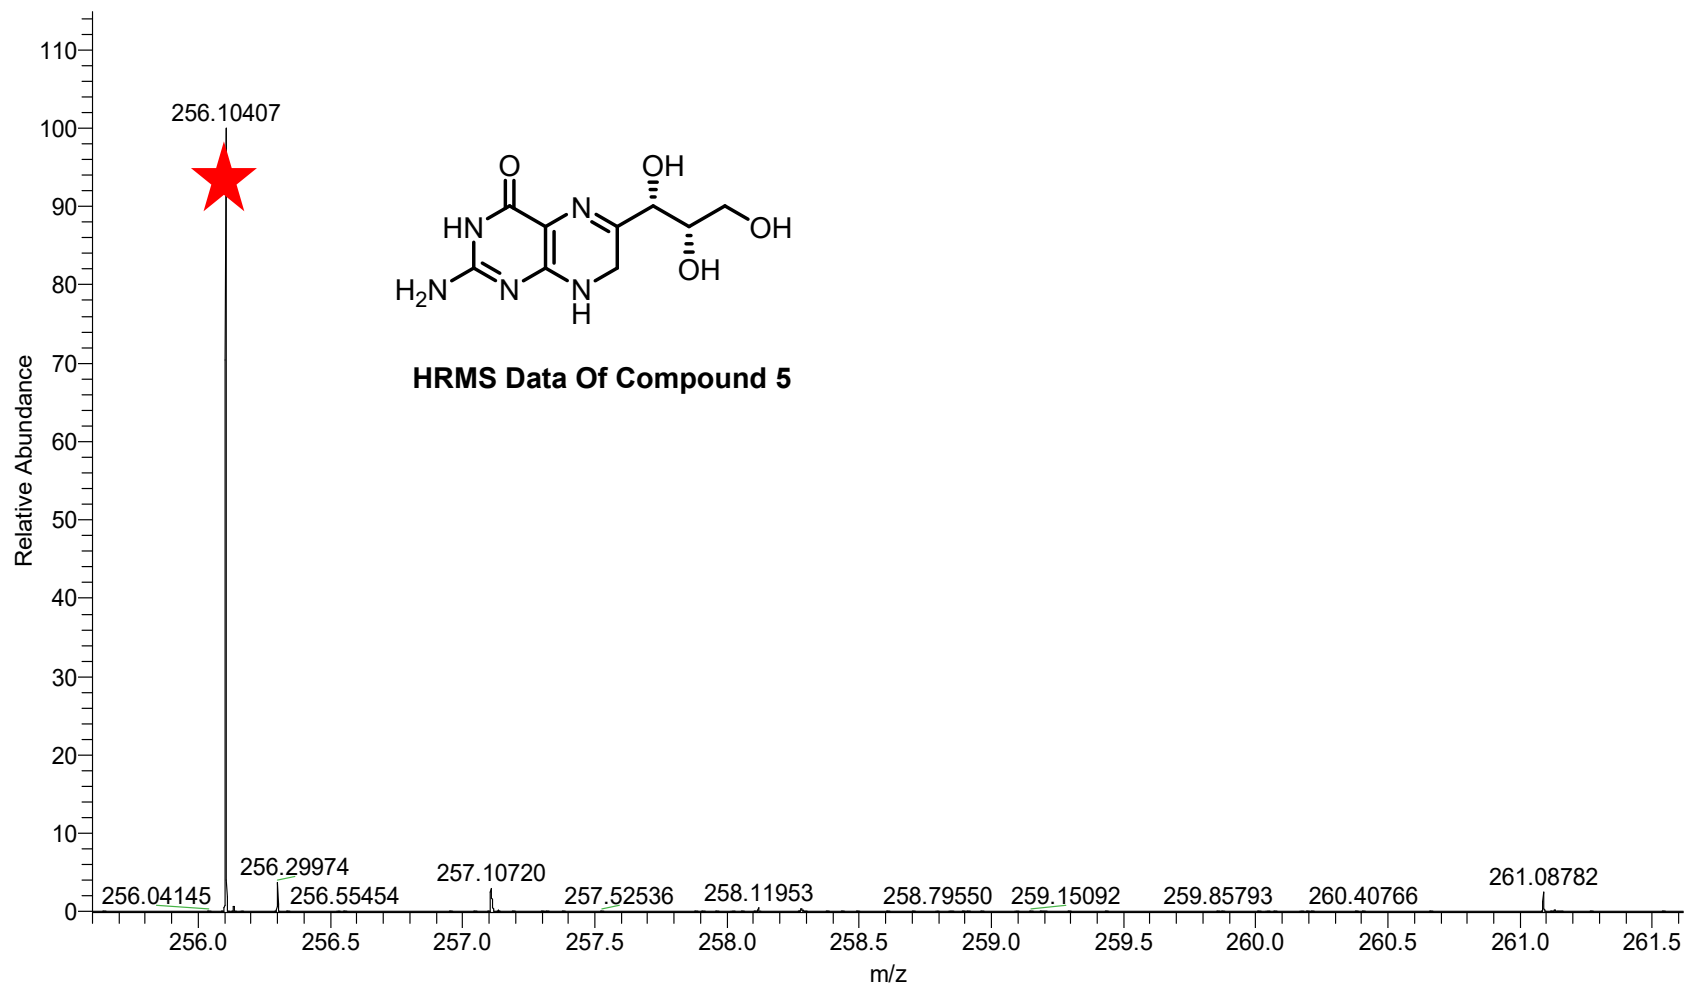

RIC-AS-13042\_ESI+\_direct\_ASH-09-1515 #1-30 RT: 0.01-0.45 AV: 30 NL: 1.47E6  
T: FTMS + p ESI Full ms [150.00-300.00]

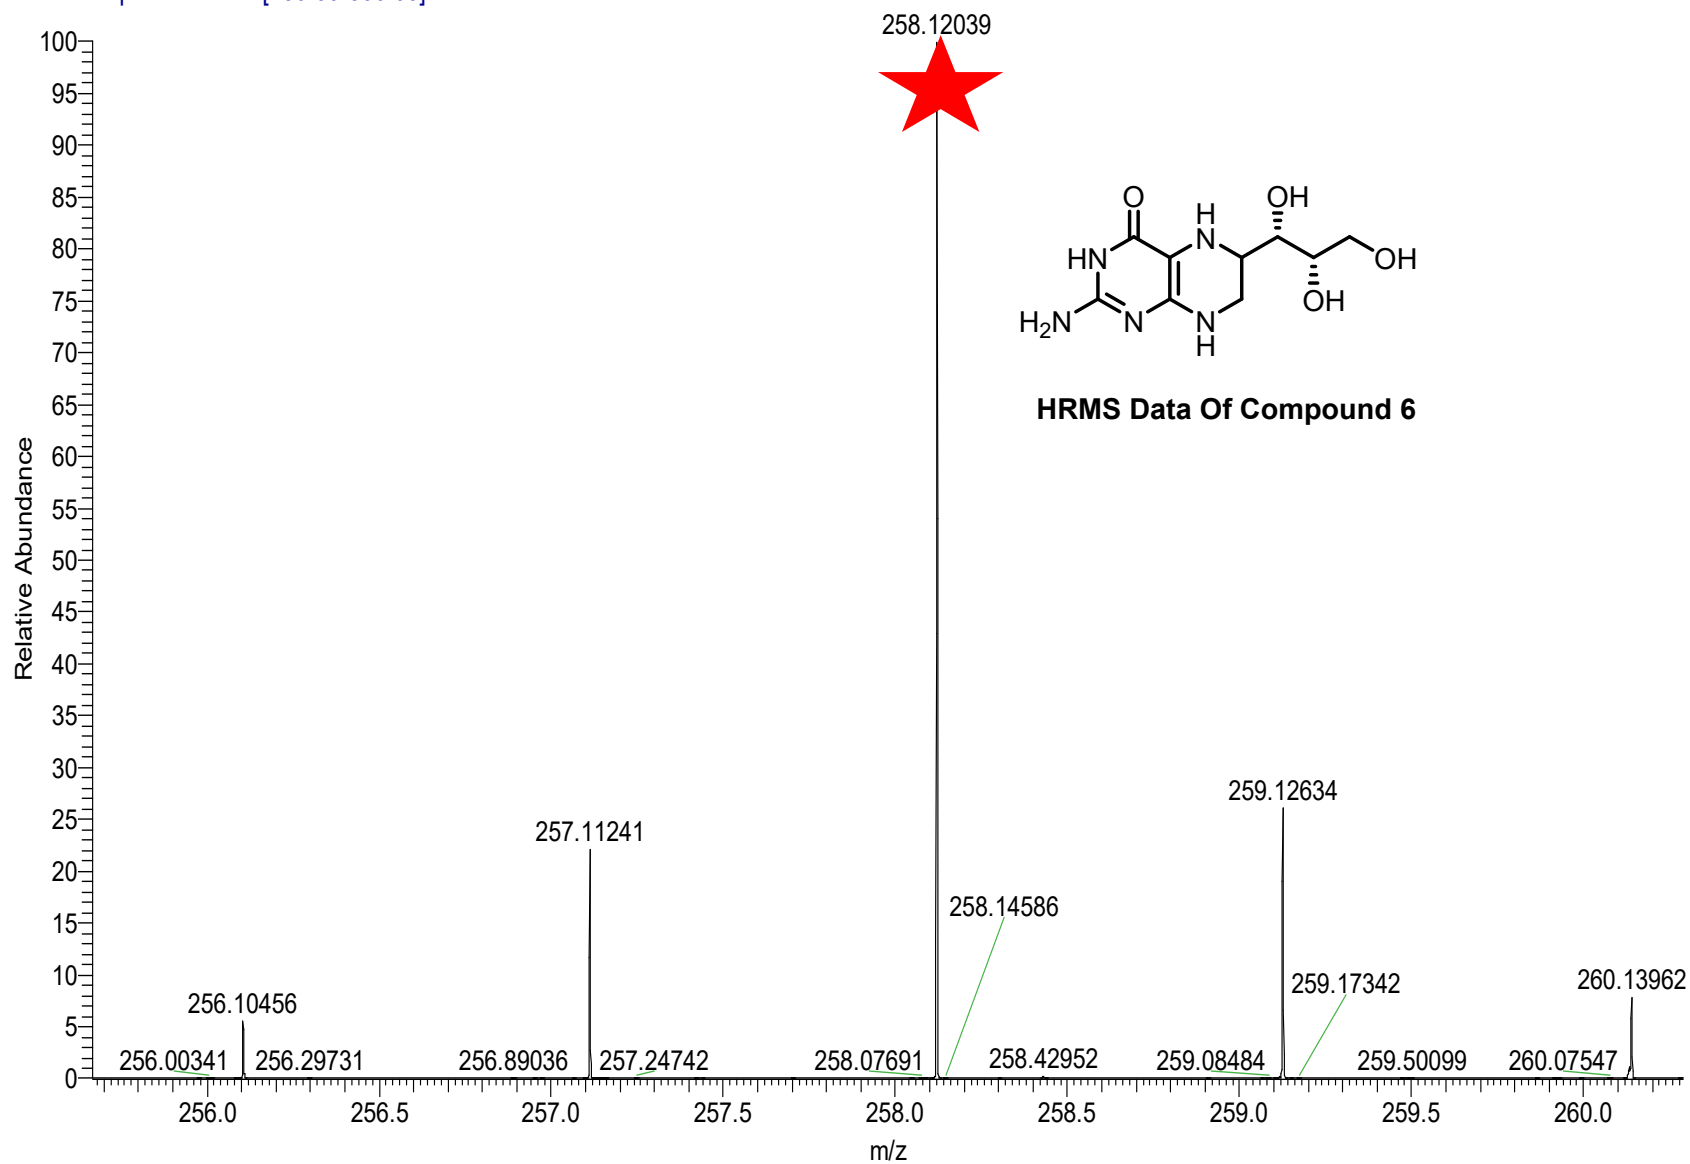

RIC-AS-13070\_ESI+\_MEOH\_1497 #1-35 RT: 0.01-0.50 AV: 35 NL: 3.75E8  
T: FTMS + p ESI Full ms [100.00-800.00]

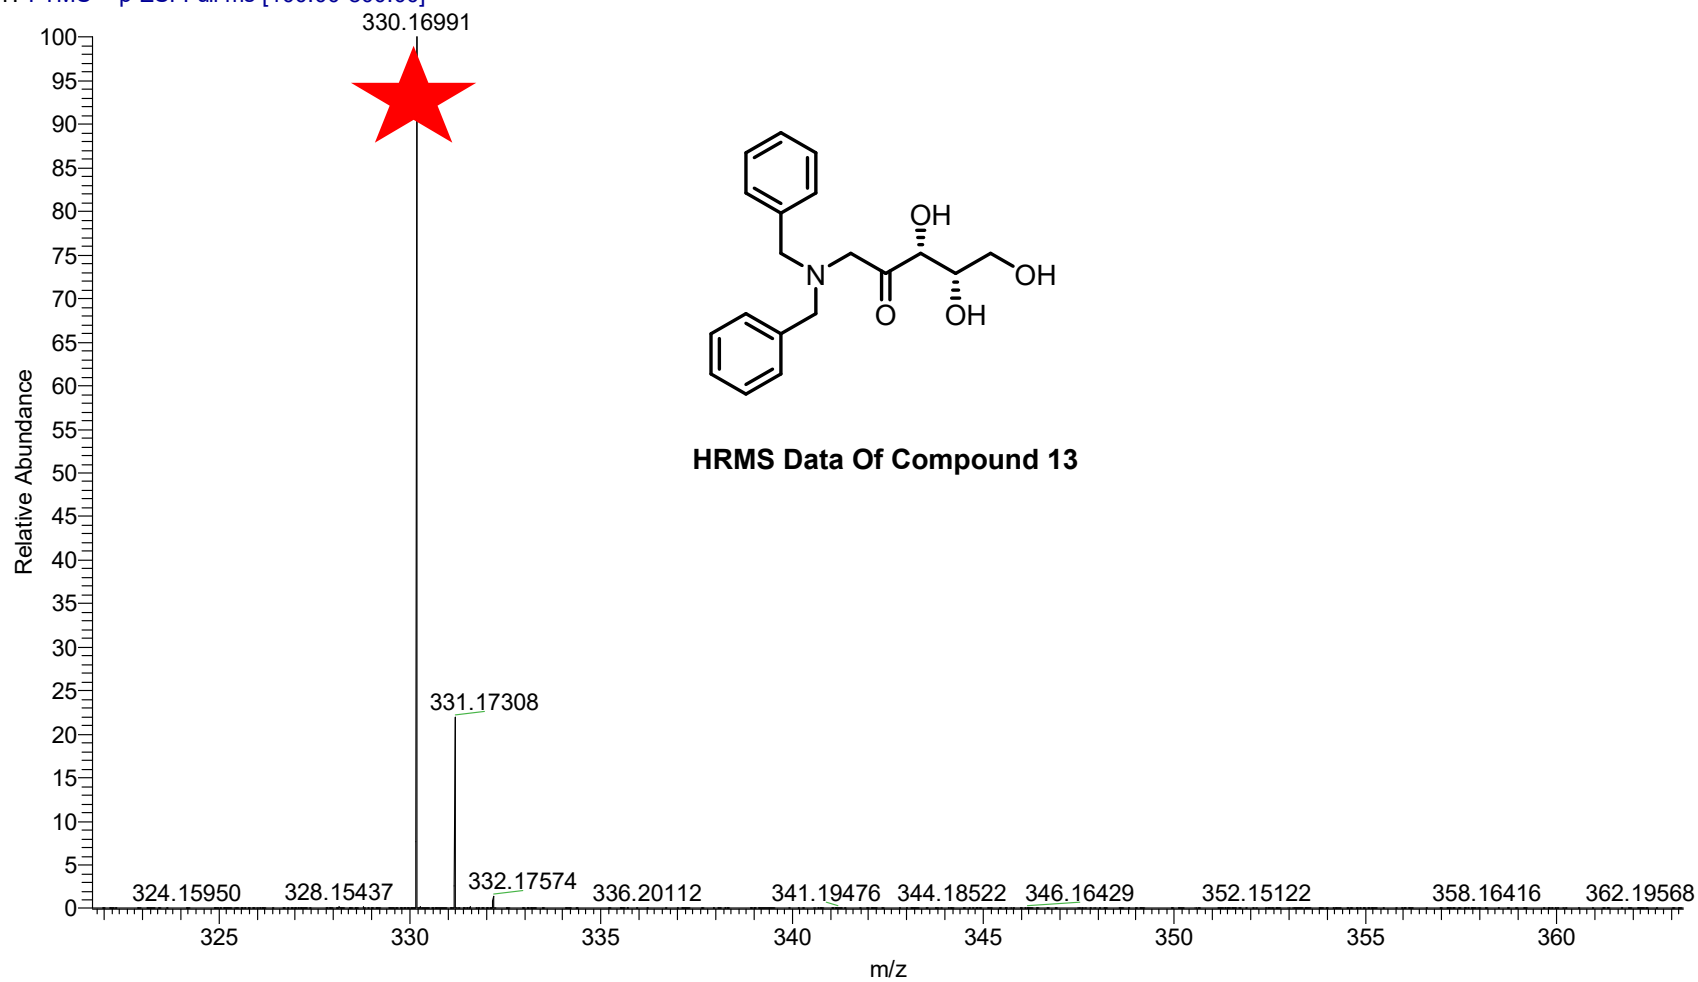

RIC-AS-13070\_ESI+\_MEOH\_1516 #1-35 RT: 0.01-0.49 AV: 35 NL: 1.90E6  
T: FTMS + p ESI Full ms [100.00-800.00]

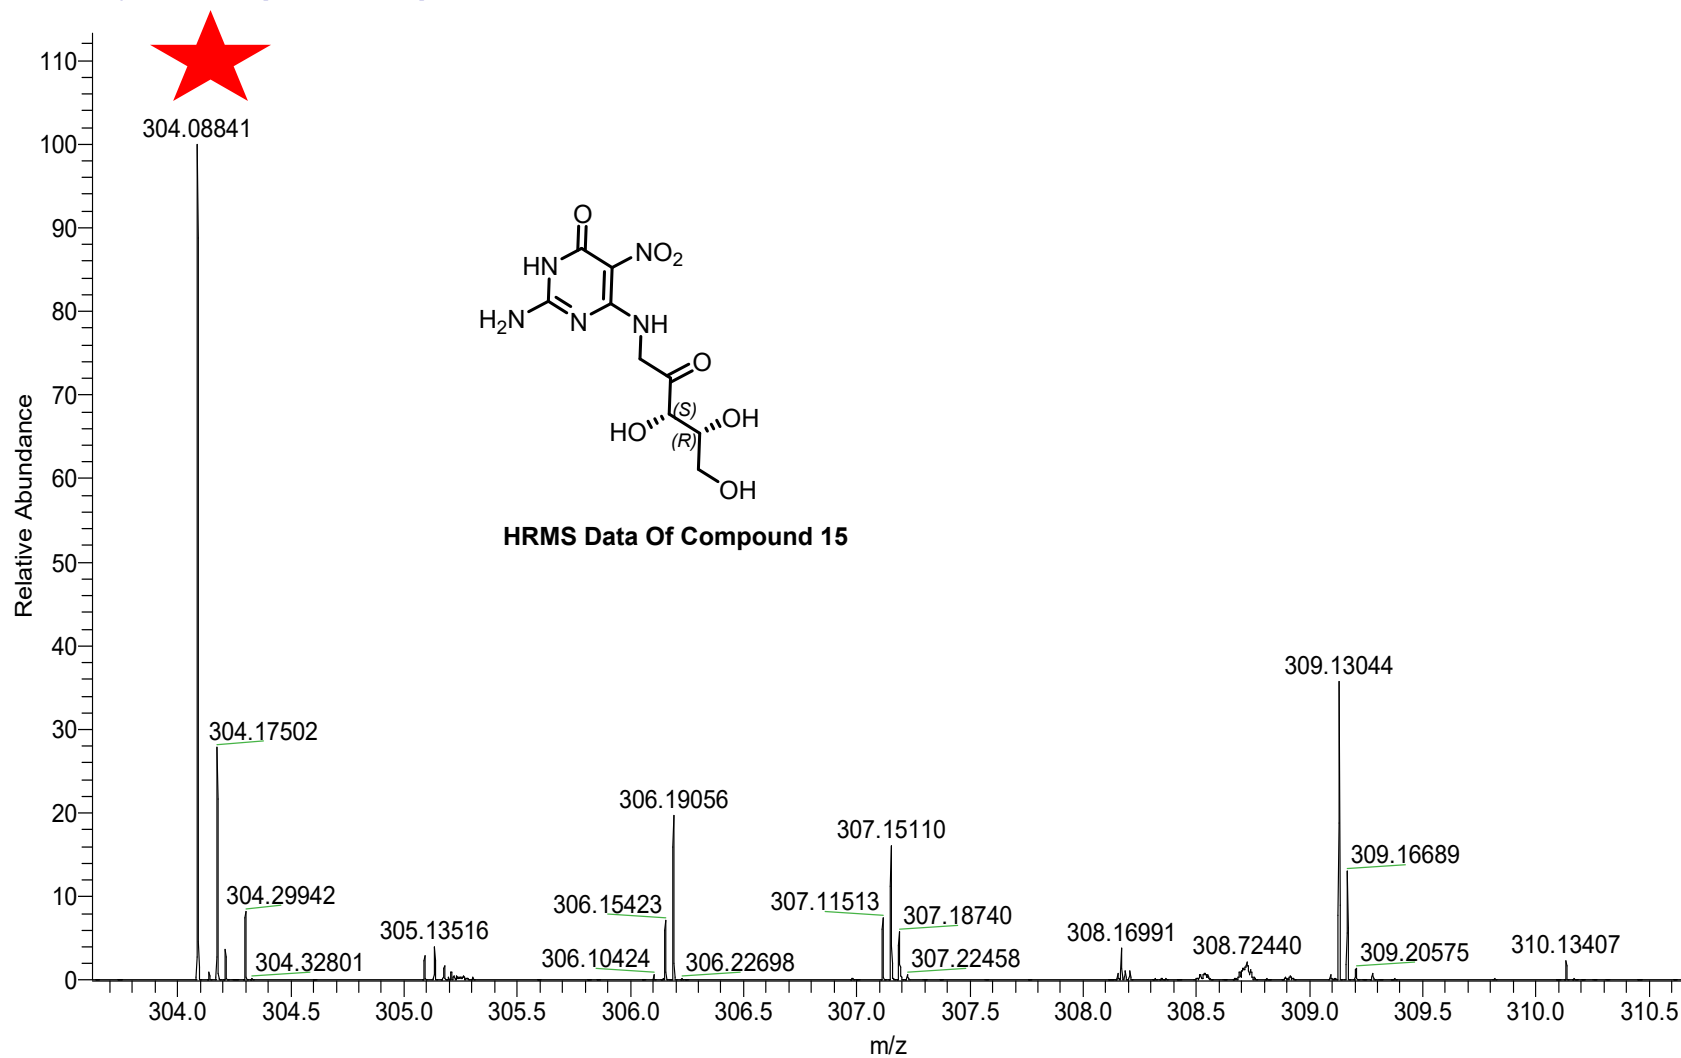

# Analytical HPLC data of Monapterin (HPLC Purified):

Data File C:\Chem32\1\Data\ASH-09-MONAPTERI-HPLC-PURITY 772.D

Sample Name: ASH-09-MONAPTERI-HPLC-PURITY

```
=====
Acq. Operator   : SYSTEM
Sample Operator : SYSTEM
Acq. Instrument : LC2                               Location : 1
Injection Date  : 9/28/2024 1:23:15 PM
                                                    Inj Volume : 5.000 µl

Acq. Method     : C:\Chem32\1\Methods\CURRENT.M
Last changed    : 9/28/2024 1:10:08 PM by SYSTEM
                (modified after loading)
Analysis Method : C:\Chem32\1\Data\ASH-09-MONAPTERI-HPLC-PURITY 772.D\DA.M (CURRENT.M, From
                Data File)
Last changed    : 9/28/2024 2:42:37 PM by SYSTEM
Sample Info     : YMC-ODSA
                2% ACN/98%H2O
                1.0 mL/min
                215 nm, 254 nm
                5µL inj., 1.0 mg/1.0 ml of water
=====
```

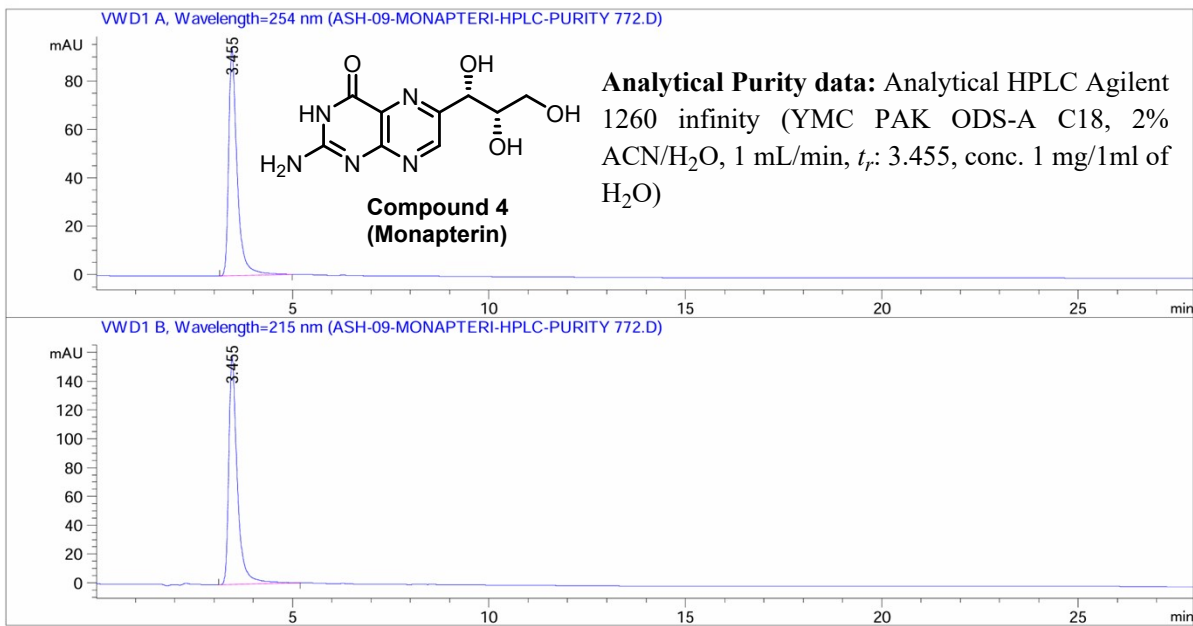

=====

### Fraction Information

=====

No Fractions found.

=====

Data File C:\Chem32\1\Data\ASH-09-MONAPTERI-HPLC-PURITY 772.D

Sample Name: ASH-09-MONAPTERI-HPLC-PURITY

=====  
Area Percent Report  
=====

Sorted By : Signal  
Multiplier : 1.0000  
Dilution : 1.0000  
Sample Amount: : 1.00000 [ng/ul] (not used in calc.)  
Use Multiplier & Dilution Factor with ISTDs

Signal 1: VWD1 A, Wavelength=254 nm

| Peak # | RetTime [min] | Type | Width [min] | Area [mAU*s] | Height [mAU] | Area %   |
|--------|---------------|------|-------------|--------------|--------------|----------|
| 1      | 3.455         | BB   | 0.2214      | 1415.17456   | 94.10886     | 100.0000 |

Totals : 1415.17456 94.10886

Signal 2: VWD1 B, Wavelength=215 nm

| Peak # | RetTime [min] | Type | Width [min] | Area [mAU*s] | Height [mAU] | Area %   |
|--------|---------------|------|-------------|--------------|--------------|----------|
| 1      | 3.455         | VB   | 0.2231      | 2405.98389   | 158.47923    | 100.0000 |

Totals : 2405.98389 158.47923

=====  
\*\*\* End of Report \*\*\*

# Analytical HPLC data of Dihydromonapterin:

Data File C:\Chem32\1\Data\ASH-09-Dihydromonapterin 791.D

Sample Name: ASH-09-Dihydromonapterin

```
=====
Acq. Operator   : SYSTEM
Sample Operator : SYSTEM
Acq. Instrument : LC2                               Location : 1
Injection Date  : 9/30/2024 5:52:03 PM
                                           Inj Volume : 5.000 µl
Different Inj Volume from Sample Entry! Actual Inj Volume : 20.000 µl
Method          : C:\Chem32\1\Methods\CURRENT.M
Last changed    : 9/30/2024 5:28:44 PM by SYSTEM
                 (modified after loading)
Sample Info     : YMC-ODSA
                 2% ACN/98%H2O
                 1.0 mL/min
                 215 nm, 254 nm
                 5µL inj., 0.5 mg/1.0 ml of water
=====
```

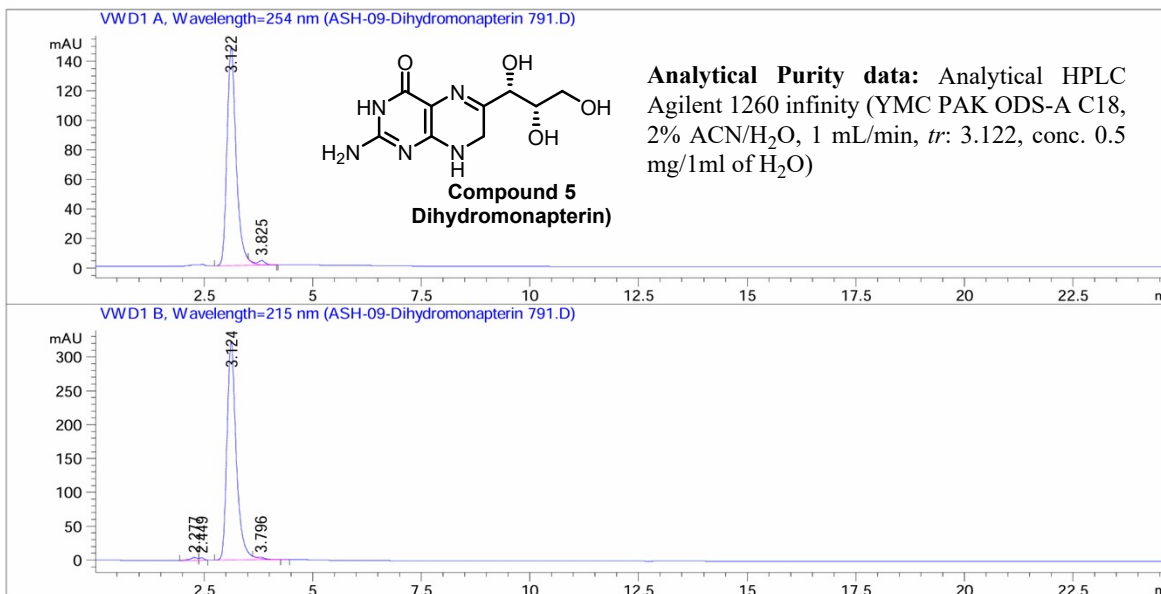

=====  
Fraction Information  
=====

No Fractions found.  
=====

=====  
Area Percent Report  
=====

```
Sorted By      : Signal
Multiplier     : 1.0000
Dilution       : 1.0000
Sample Amount: : 1.00000 [ng/ul] (not used in calc.)
Use Multiplier & Dilution Factor with ISTDs
```

Data File C:\Chem32\1\Data\ASH-09-Dihydromonapterin 791.D  
Sample Name: ASH-09-Dihydromonapterin

Signal 1: VWD1 A, Wavelength=254 nm

| Peak # | RetTime [min] | Type | Width [min] | Area [mAU*s] | Height [mAU] | Area %  |
|--------|---------------|------|-------------|--------------|--------------|---------|
| 1      | 3.122         | BV R | 0.2247      | 2196.68066   | 148.36096    | 98.4279 |
| 2      | 3.825         | VB E | 0.1669      | 35.08458     | 2.98938      | 1.5721  |

Totals :                                   2231.76525   151.35034

Signal 2: VWD1 B, Wavelength=215 nm

| Peak # | RetTime [min] | Type | Width [min] | Area [mAU*s] | Height [mAU] | Area %  |
|--------|---------------|------|-------------|--------------|--------------|---------|
| 1      | 2.277         | BV   | 0.1634      | 49.97865     | 4.30703      | 1.0125  |
| 2      | 2.449         | VB   | 0.1057      | 24.98795     | 3.56917      | 0.5062  |
| 3      | 3.124         | BV R | 0.2245      | 4839.72412   | 323.63531    | 98.0491 |
| 4      | 3.796         | VB E | 0.1607      | 21.33151     | 1.90399      | 0.4322  |

Totals :                                   4936.02223   333.41552

=====  
\*\*\* End of Report \*\*\*



# Analytical HPLC data of compound 15 (HPLC Purified):

Data File C:\Chem32\1\Data\ASH-09-1515-INTERMEDIATE-PURITY 783.D  
Sample Name: ASH-09-1515-INTERMEDIATE-PURITY

```
=====
Acq. Operator   : SYSTEM
Sample Operator : SYSTEM
Acq. Instrument : LC2                               Location : 1
Injection Date  : 9/28/2024 6:58:35 PM
                                                    Inj Volume : 20.000 µl

Acq. Method     : C:\Chem32\1\Methods\CURRENT.M
Last changed    : 9/28/2024 6:57:13 PM by SYSTEM
                  (modified after loading)
Analysis Method : C:\Chem32\1\Data\ASH-09-1515-INTERMEDIATE-PURITY 783.D\DA.M (CURRENT.M,
                  From Data File)
Last changed    : 9/28/2024 7:19:40 PM by SYSTEM
Sample Info     : YMC-ODSA
                  10% ACN/90%H2O
                  1.0 mL/min
                  215 nm, 254 nm
                  5µL inj., 0.5 mg/1.0 ml of water
=====
```

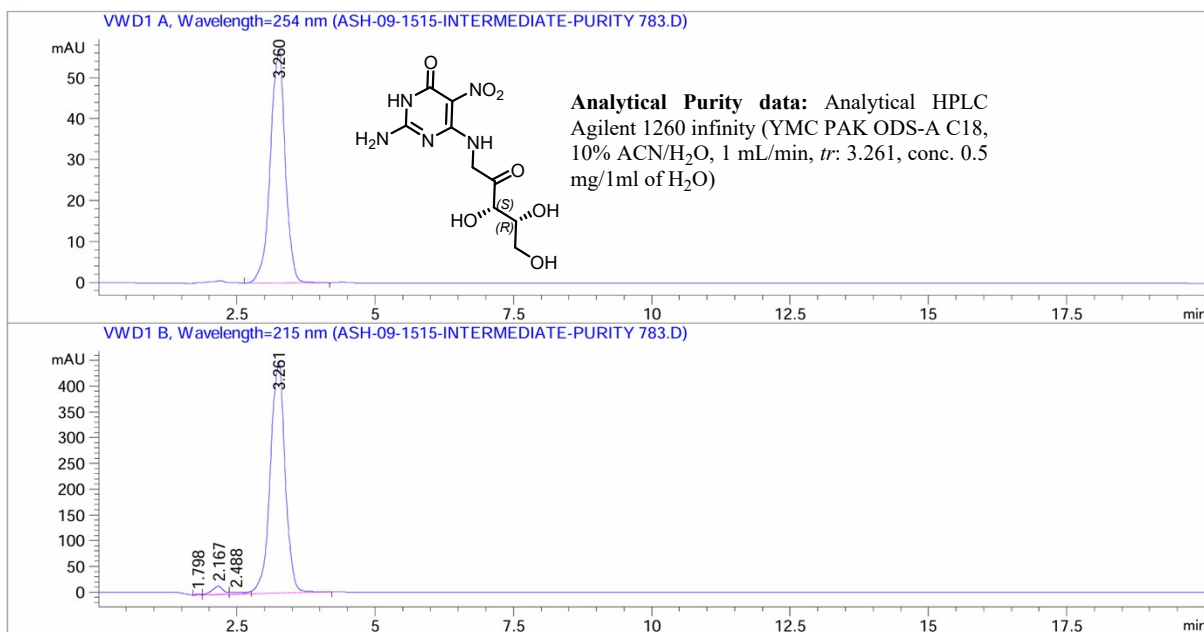

=====

### Fraction Information

=====

No Fractions found.

=====

Sample Name: ASH-09-1515-INTERMEDIATE-PURITY

=====  
Area Percent Report  
=====

Sorted By : Signal  
Multiplier : 1.0000  
Dilution : 1.0000  
Sample Amount: : 1.00000 [ng/ul] (not used in calc.)  
Use Multiplier & Dilution Factor with ISTDs

Signal 1: VWD1 A, Wavelength=254 nm

| Peak # | RetTime [min] | Type | Width [min] | Area [mAU*s] | Height [mAU] | Area %   |
|--------|---------------|------|-------------|--------------|--------------|----------|
| 1      | 3.260         | BB   | 0.2899      | 1069.18726   | 56.71944     | 100.0000 |

Totals : 1069.18726 56.71944

Signal 2: VWD1 B, Wavelength=215 nm

| Peak # | RetTime [min] | Type | Width [min] | Area [mAU*s] | Height [mAU] | Area %  |
|--------|---------------|------|-------------|--------------|--------------|---------|
| 1      | 1.798         | BV E | 0.0928      | 15.63502     | 2.65137      | 0.1792  |
| 2      | 2.167         | VV E | 0.2067      | 227.08672    | 16.28590     | 2.6033  |
| 3      | 2.488         | VV E | 0.2292      | 62.42081     | 3.65579      | 0.7156  |
| 4      | 3.261         | VB R | 0.2892      | 8417.91699   | 448.08588    | 96.5019 |

Totals : 8723.05954 470.67894

=====  
\*\*\* End of Report \*\*\*  
=====
